# Supplementary material for: Development of water-soluble phenazine-2,3-diol-based photosensitizers for singlet oxygen generation
Source: Royal Society of Chemistry journal article supplement (doi:10.1039/d3ob00491k), 2023-01-01
Supplement: d3ob00491k1.pdf [file d3ob00491k1.pdf]

## Supplementary Information

### **Development of water-soluble phenazine-2,3-diol-based photosensitizers for singlet oxygen generation**

Kazunori Yagi, Kazuki Ohira, Keita Yamana, Keiichi Imato, Riku Kawasaki, Atsushi Ikeda  
and Yousuke Ooyama\*

*Applied Chemistry Program, Graduate School of Advanced Science and Engineering,  
Hiroshima University, 1-4-1 Kagamiyama, Higashi-Hiroshima 739-8527, Japan. E-mail:  
yooyama@hiroshima-u.ac.jp*

## Synthesis

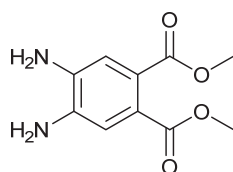

Compound **1**. A solution of dimethyl 4-amino-5-nitrophthalate (407 mg, 1.60 mmol) and ammonium chloride (428 mg, 8.00 mmol) in the mixture of ethanol (360 mL) and water (40 mL) was stirred at 80 °C with iron powder (447 mg, 8.00 mmol) overnight under N<sub>2</sub> atmosphere. After concentrating under reduced pressure, the residue was chromatographed on silica gel (methanol/dichloromethane = 1/19 as eluent) to give **1** as light brown solid (277 mg, 80% yield); m.p. 109–112 °C; IR (ATR): = 3441, 3414, 3360, 3298, 3273, 3248, 2949, 1717, 1688, 1668, 1626, 1589, 1574, 1566, 1522 cm<sup>-1</sup>; <sup>1</sup>H NMR (500 MHz, dimethyl sulfoxide (DMSO)-d<sub>6</sub>): δ = 6.79 (s, 2H, aromatic), 5.22 (s, 4H, NH<sub>2</sub>), 3.68 (s, 6H, CH<sub>3</sub>) ppm; <sup>13</sup>C NMR (125 MHz, DMSO-d<sub>6</sub>): δ = 168.30, 137.09, 120.70, 113.60, 51.85 ppm; HRMS (ESI): *m/z* found 247.06876 [M+Na]<sup>+</sup>, calculated for C<sub>10</sub>H<sub>12</sub>O<sub>4</sub>N<sub>2</sub>Na [M+Na]<sup>+</sup>: 247.06893.

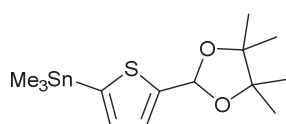

Compound **2** was synthesized by the method in our previous study.<sup>1</sup>

## Reference

1. S. Tsumura, K. Ohira, K. Hashimoto, K. Imato, and Y. Ooyama, *Mater. Chem. Front.*, 2020, **4**, 2762-2771.

## NMR spectra

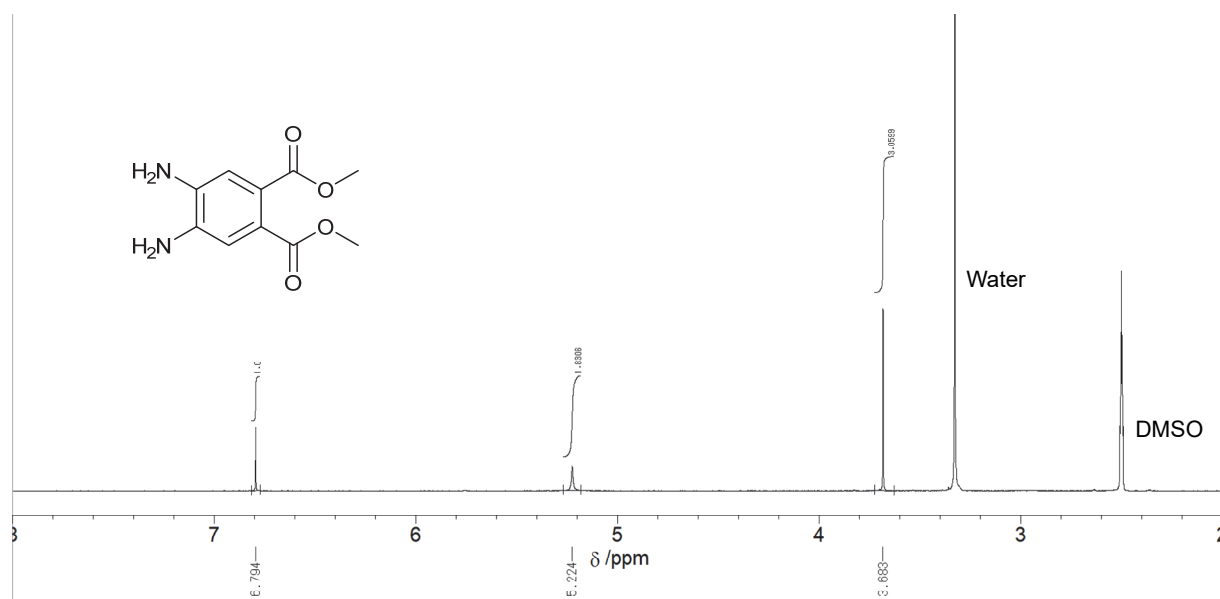

**Fig. S1.**  $^1\text{H}$  NMR spectrum of **1** in  $\text{DMSO}-d_6$ .

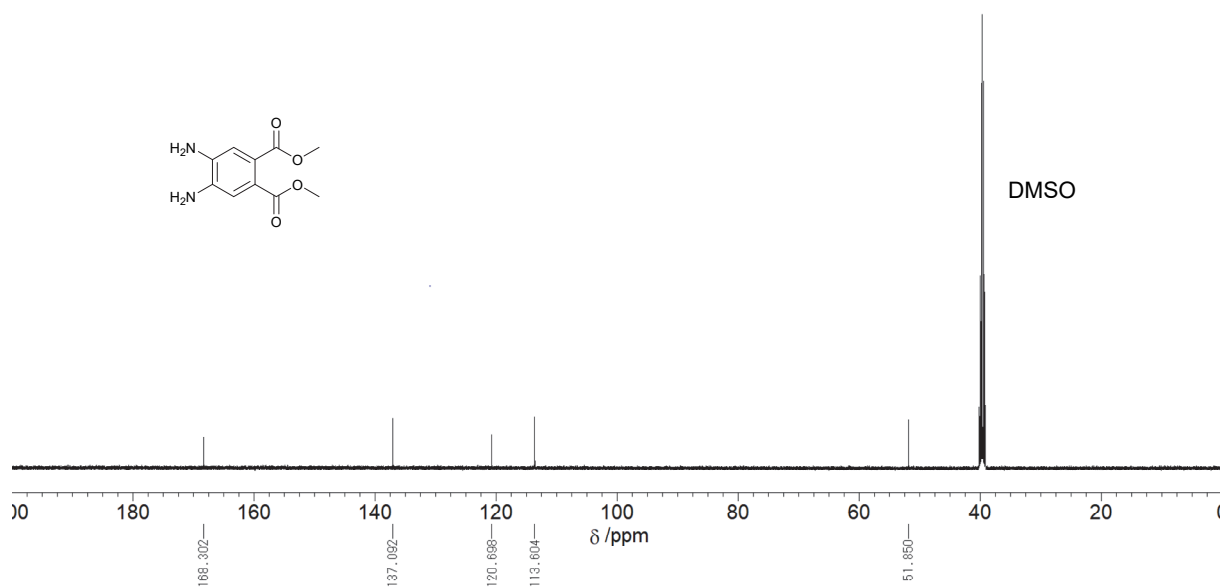

**Fig. S2.**  $^{13}\text{C}$  NMR spectrum of **1** in  $\text{DMSO}-d_6$ .

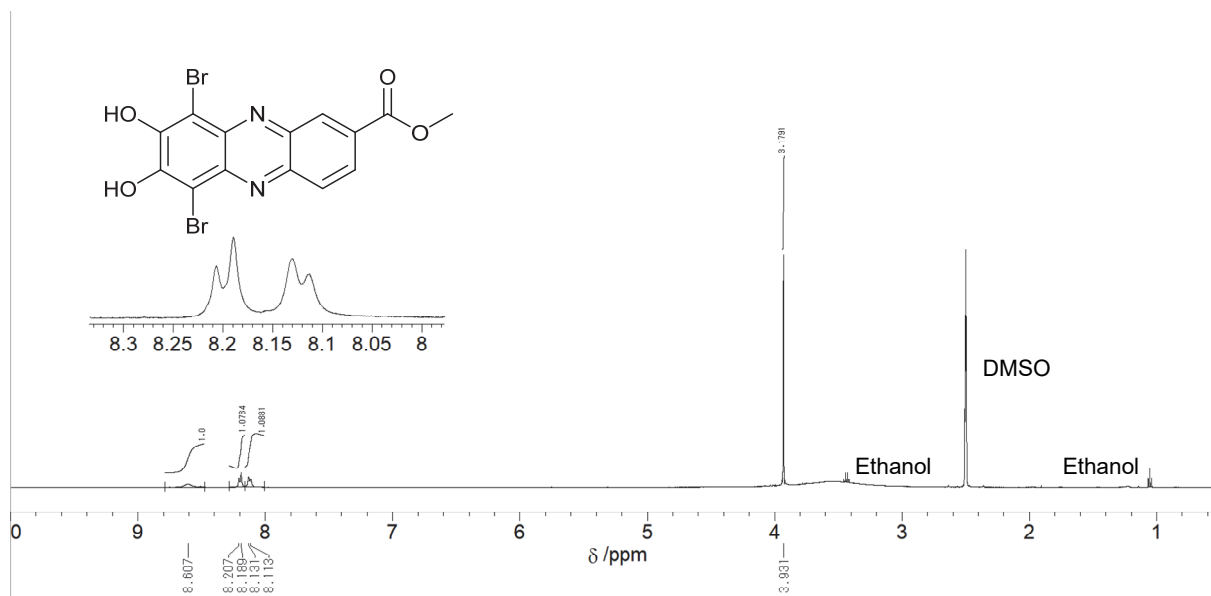

**Fig. S3**  $^1\text{H NMR}$  spectrum of **3** in  $\text{DMSO-}d_6$ .

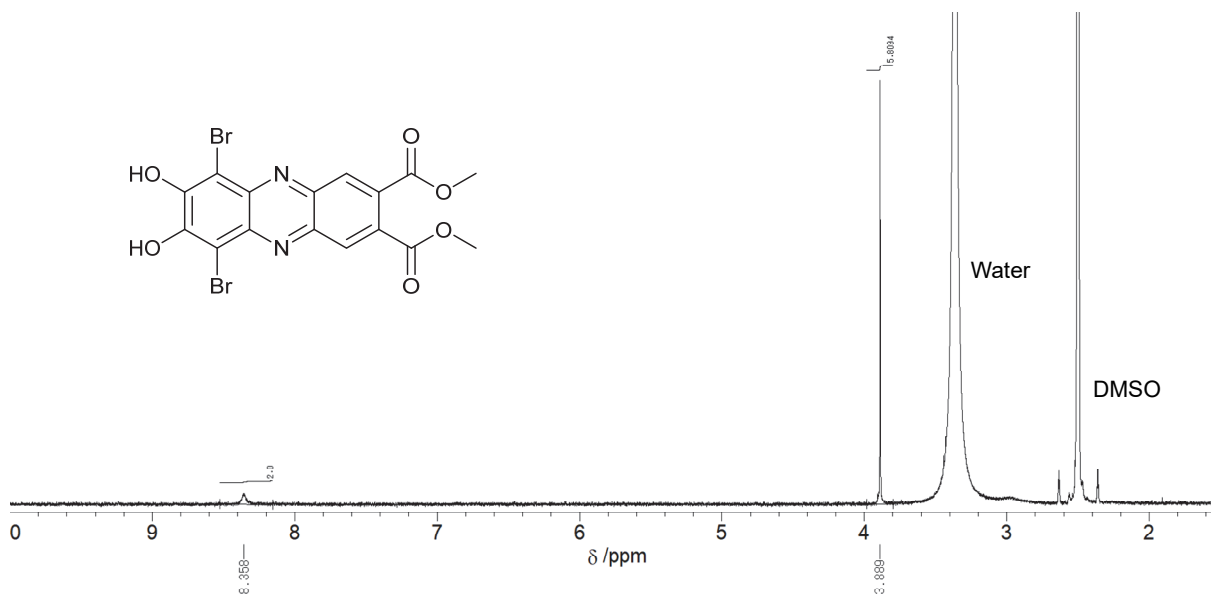

**Fig. S4**  $^1\text{H NMR}$  spectrum of **4** in  $\text{DMSO-}d_6$ .

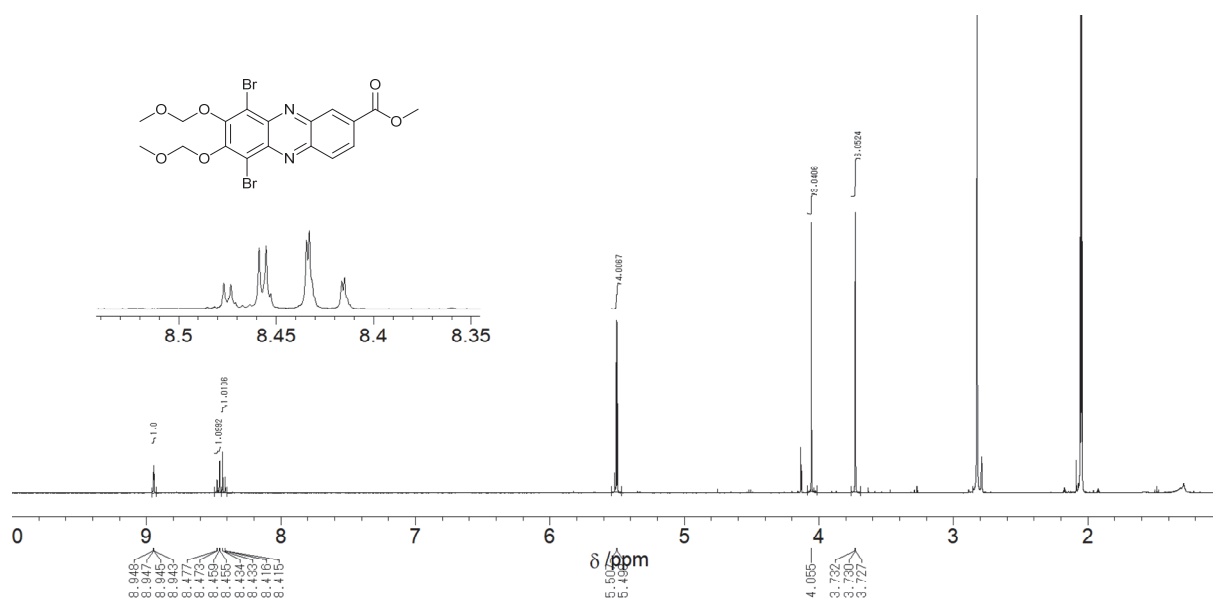

**Fig. S5** <sup>1</sup>H NMR spectrum of **5** in acetone-*d*<sub>6</sub>.

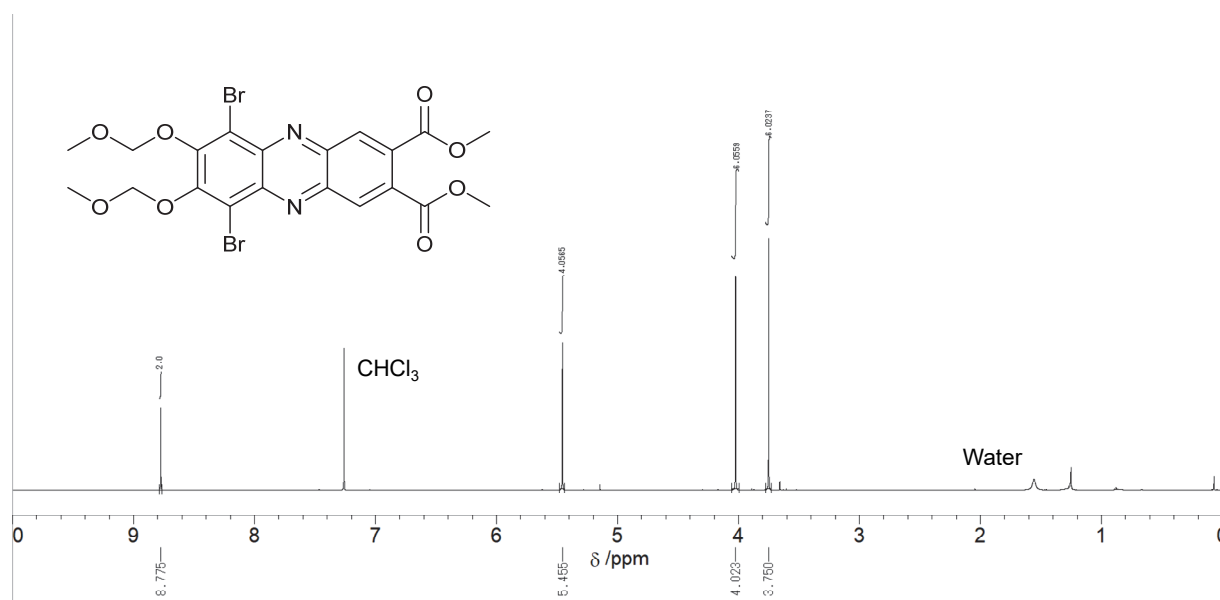

**Fig. S6** <sup>1</sup>H NMR spectrum of **6** in CDCl<sub>3</sub>.

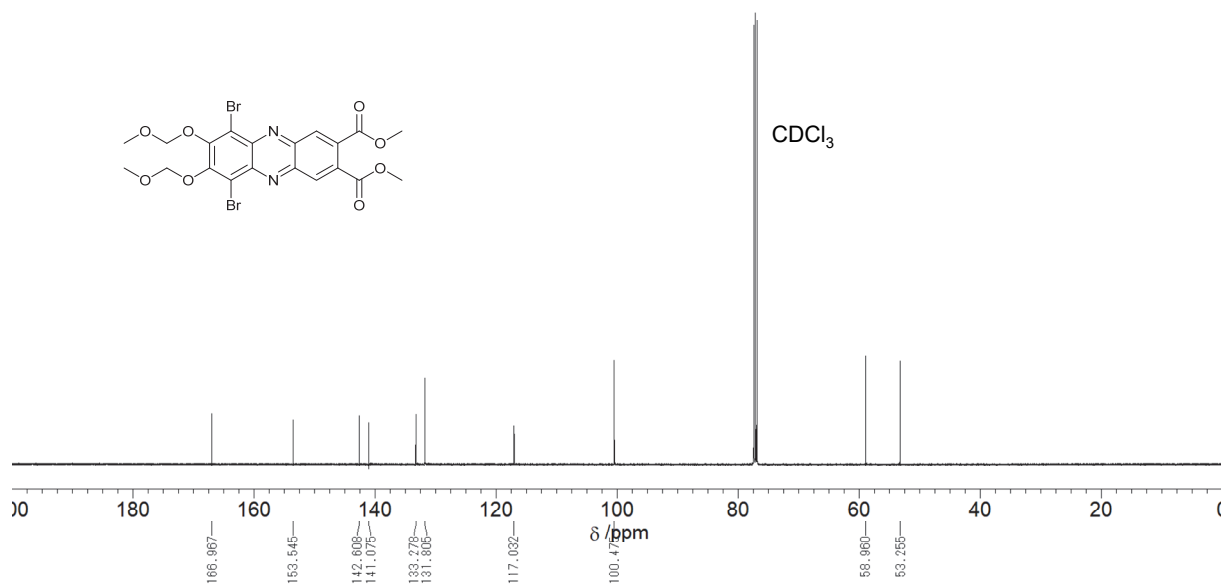

Fig. S7  $^{13}\text{C}$  NMR spectrum of 6 in  $\text{CDCl}_3$ .

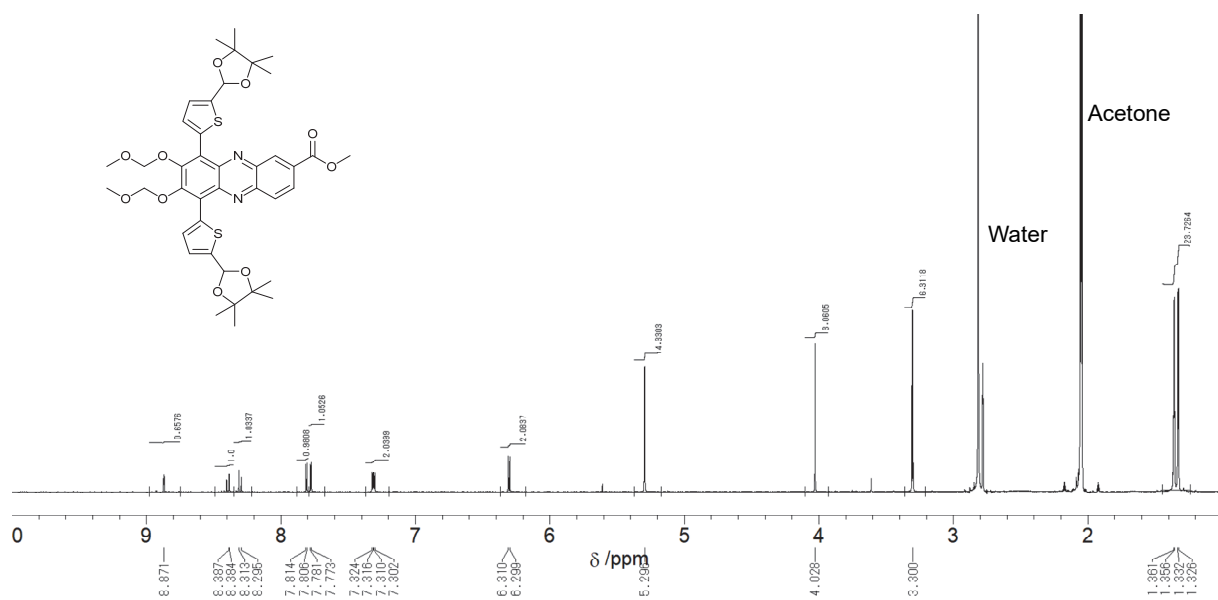

Fig. S8  $^1\text{H}$  NMR spectrum of 7 in  $\text{acetone-}d_6$ .

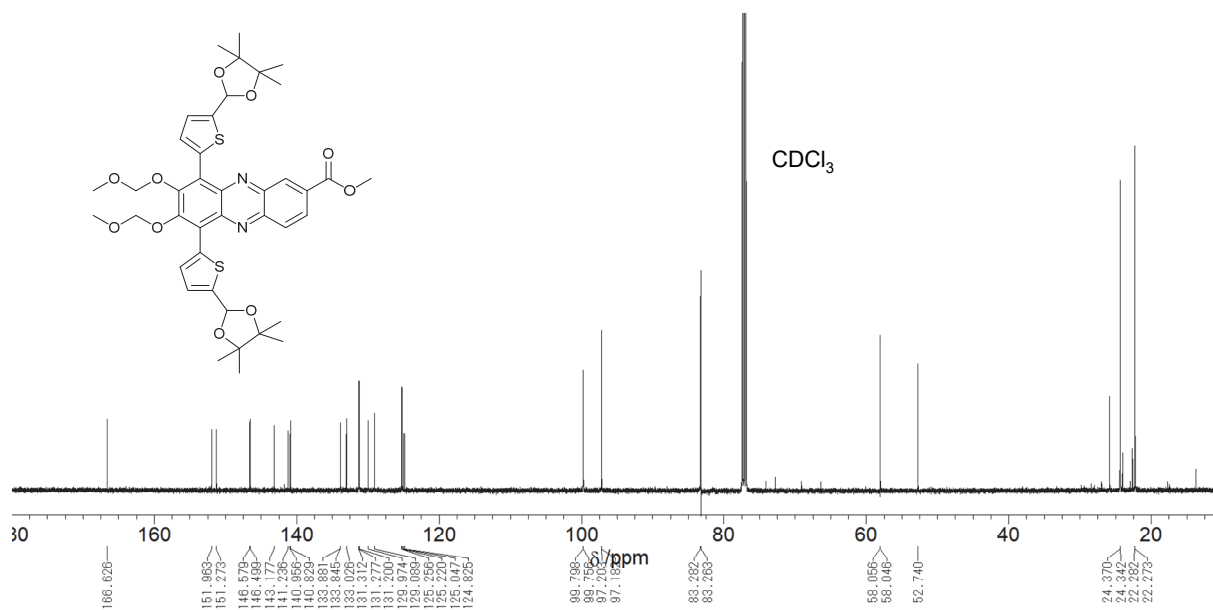

Fig. S9  $^{13}\text{C}$  NMR spectrum of 7 in  $\text{CDCl}_3$ .

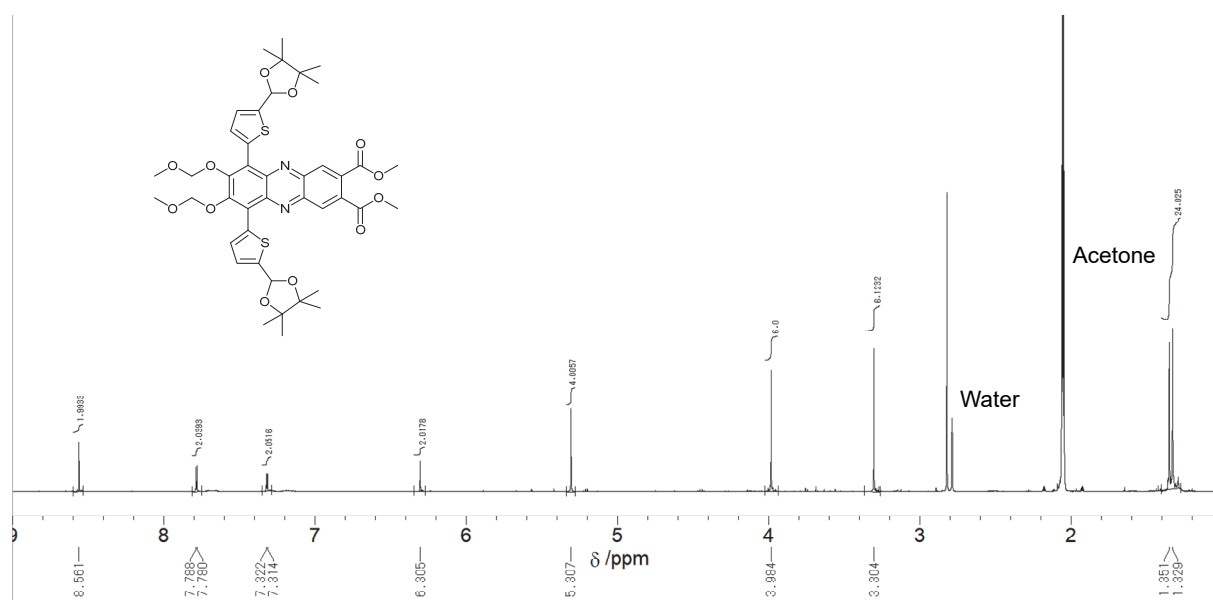

Fig. S10  $^1\text{H}$  NMR spectrum of 8 in  $\text{acetone-}d_6$ .

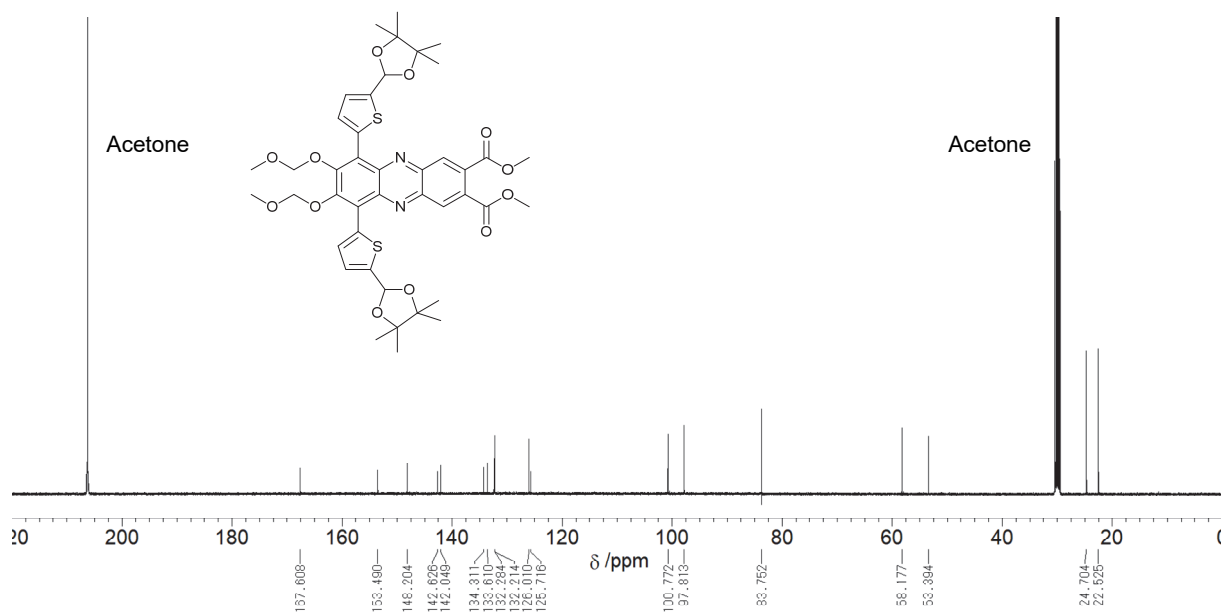

**Fig. S11**  $^{13}\text{C}$  NMR spectrum of **8** in acetone- $d_6$ .

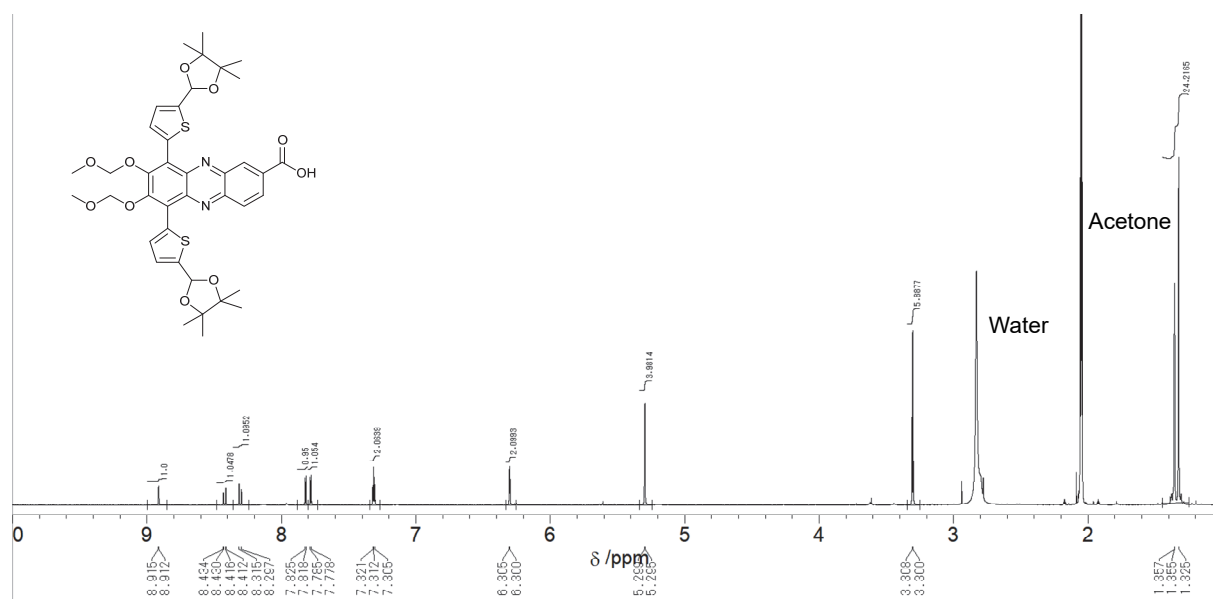

**Fig. S12**  $^1\text{H}$  NMR spectrum of **9** in acetone- $d_6$ .





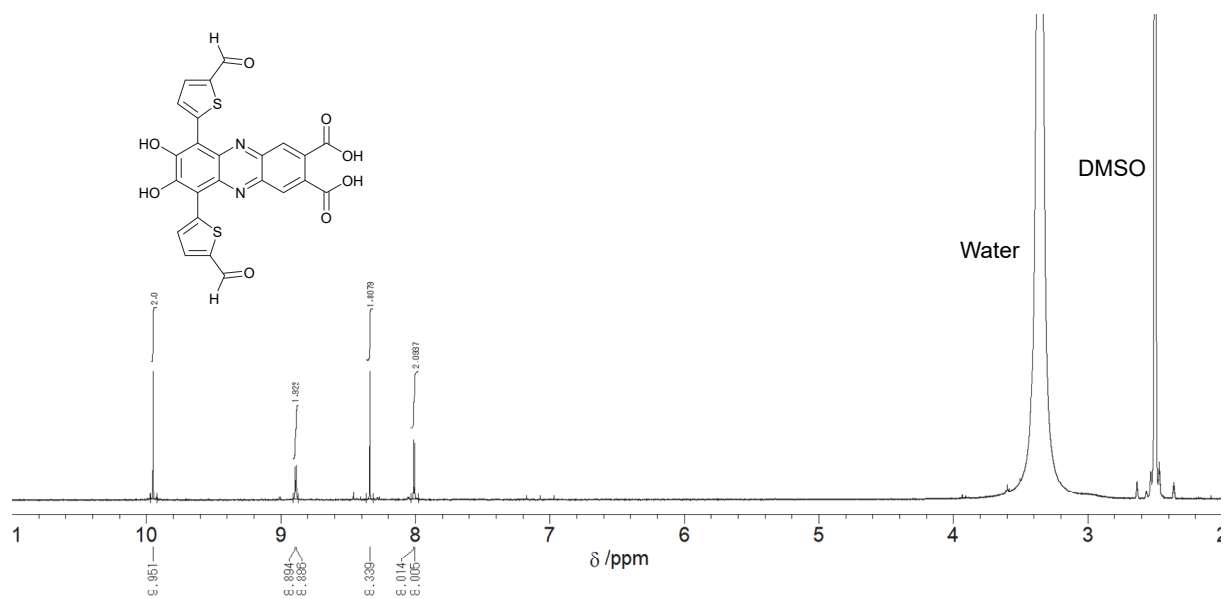

**Fig. S15**  $^1\text{H}$  NMR spectrum of KY-2 in  $\text{DMSO-}d_6$ .

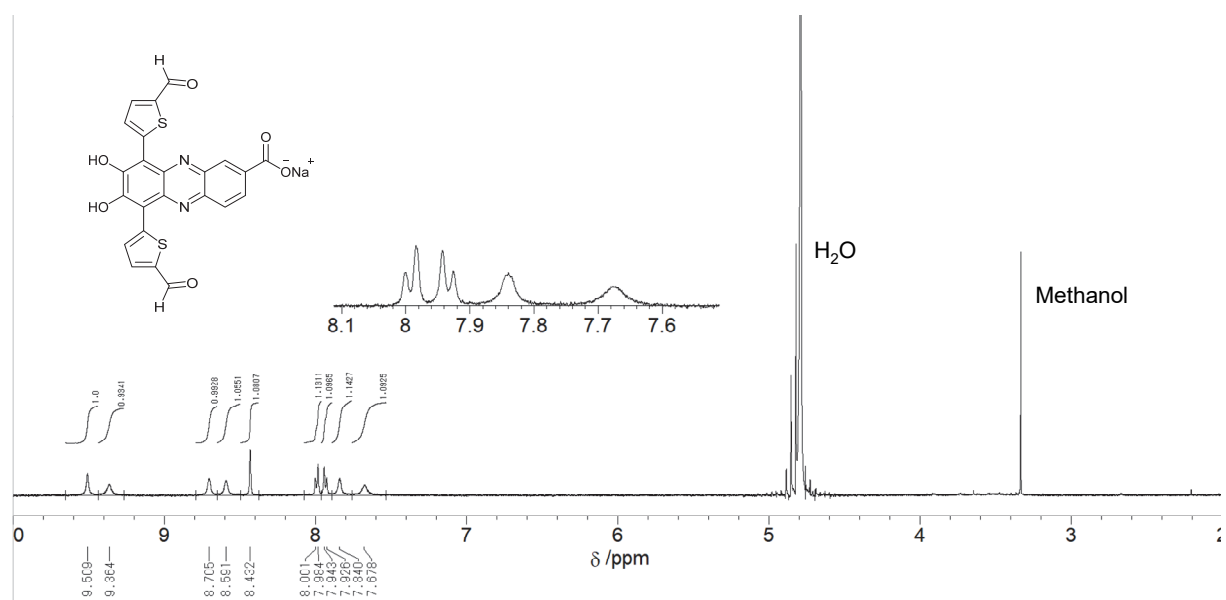

**Fig. S16**  $^1\text{H}$  NMR spectrum of KY-1Na in  $\text{D}_2\text{O}$ .

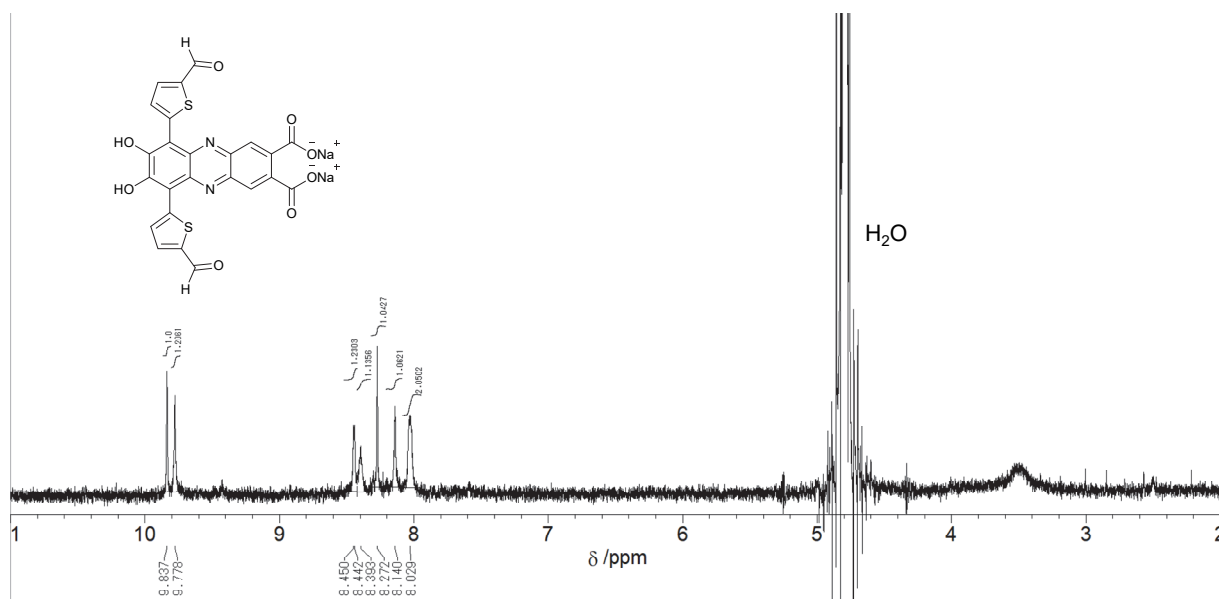

**Fig. S17** <sup>1</sup>H NMR spectrum of KY-2Na in D<sub>2</sub>O.

## HRMS spectra

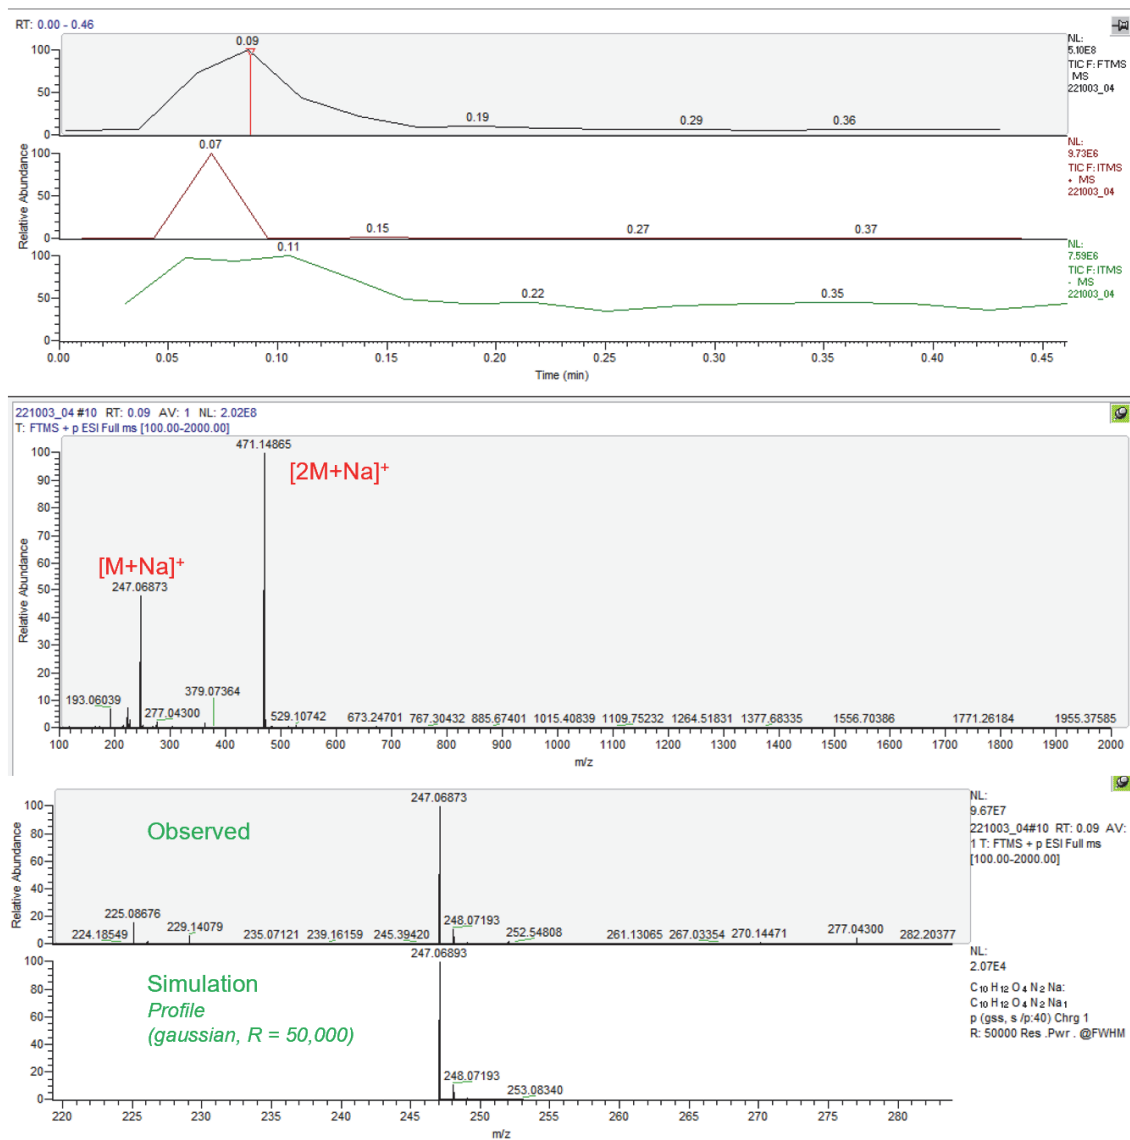

Fig. S18 HRMS spectrum of 1.

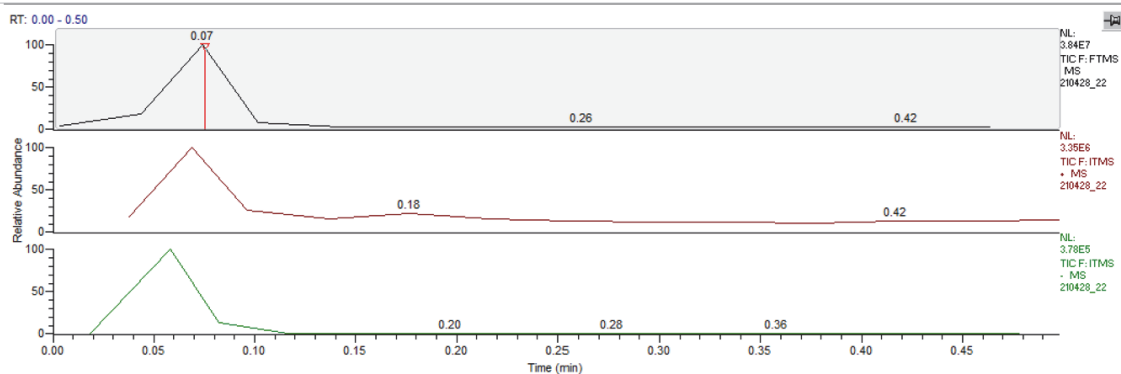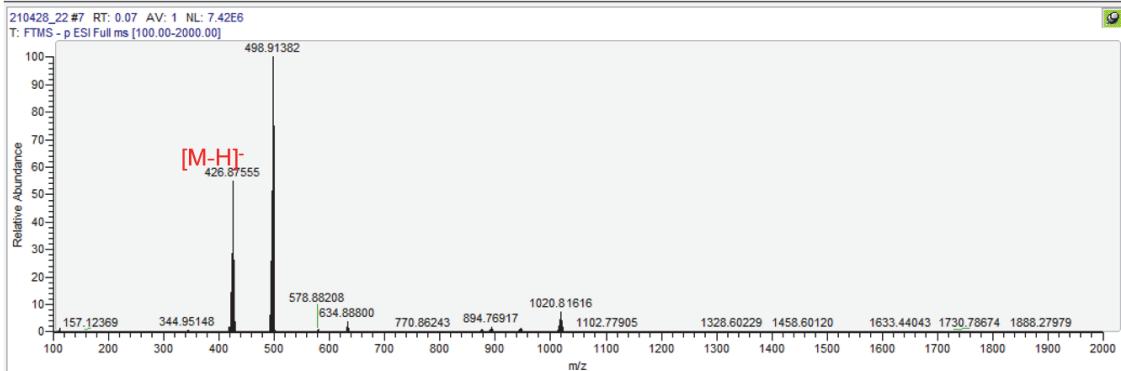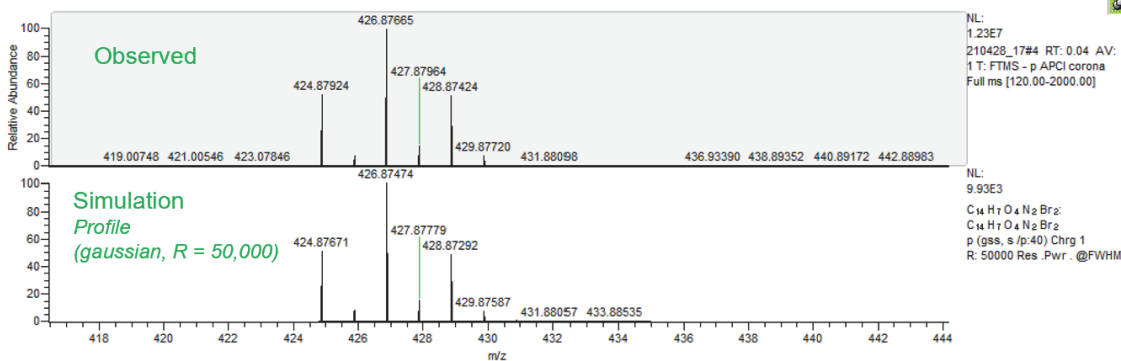

Fig. S19 HRMS spectrum of 3.

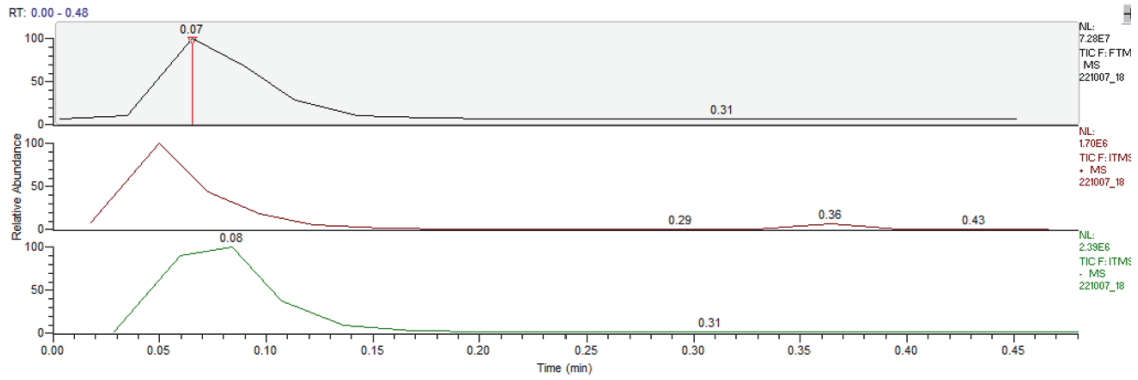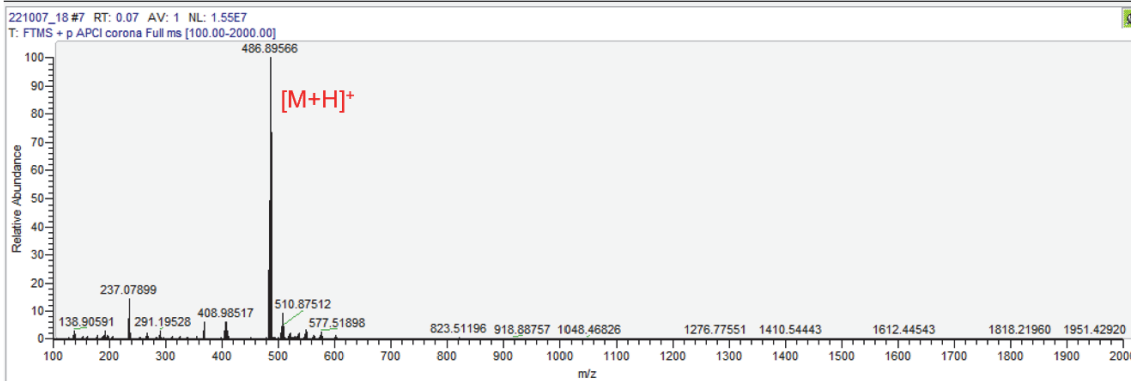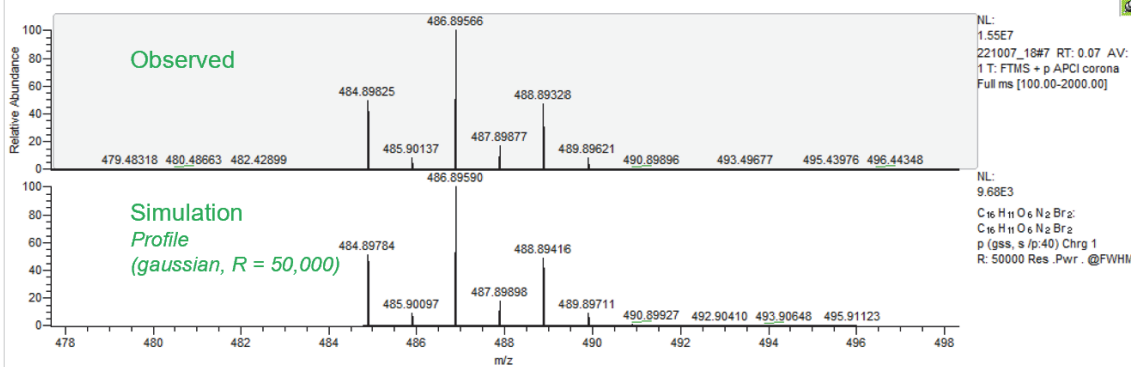

Fig. S20 HRMS spectrum of 4.

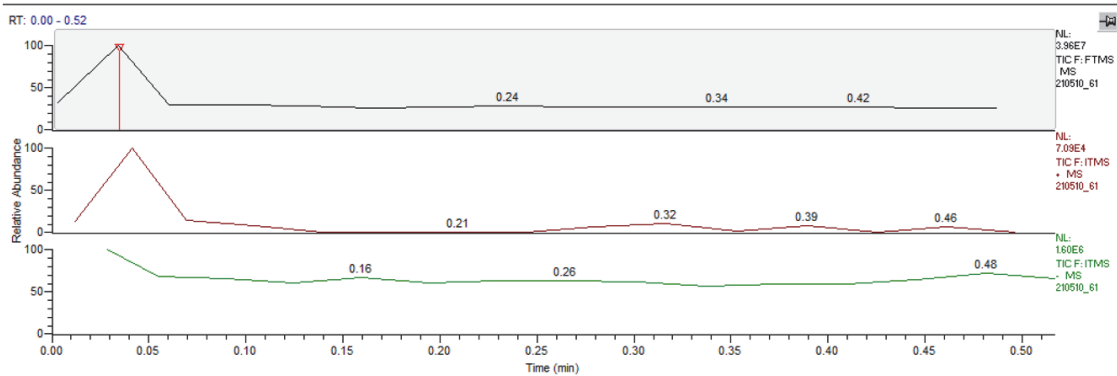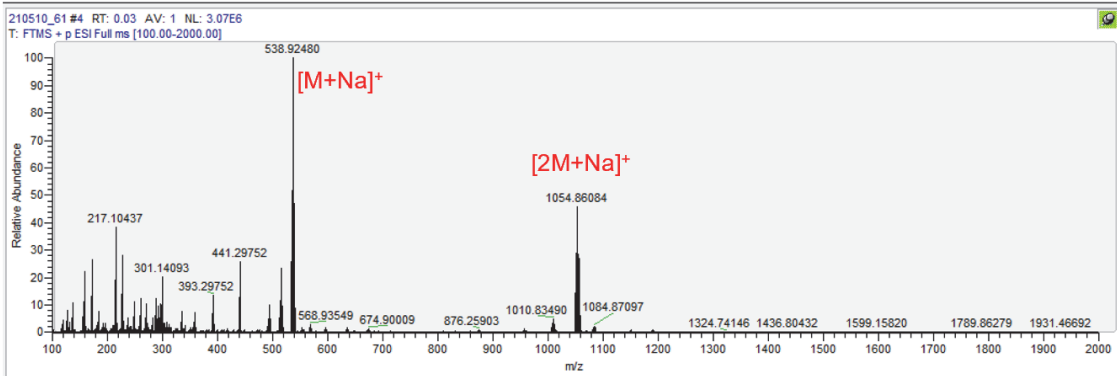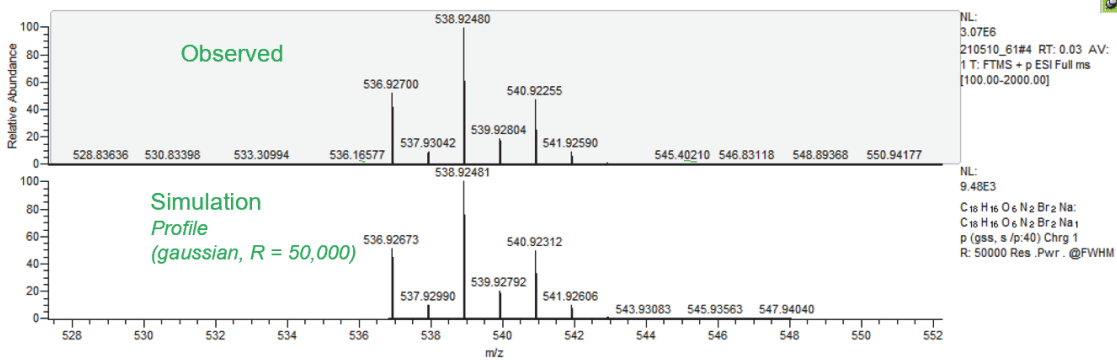

Fig. S21 HRMS spectrum of 5.

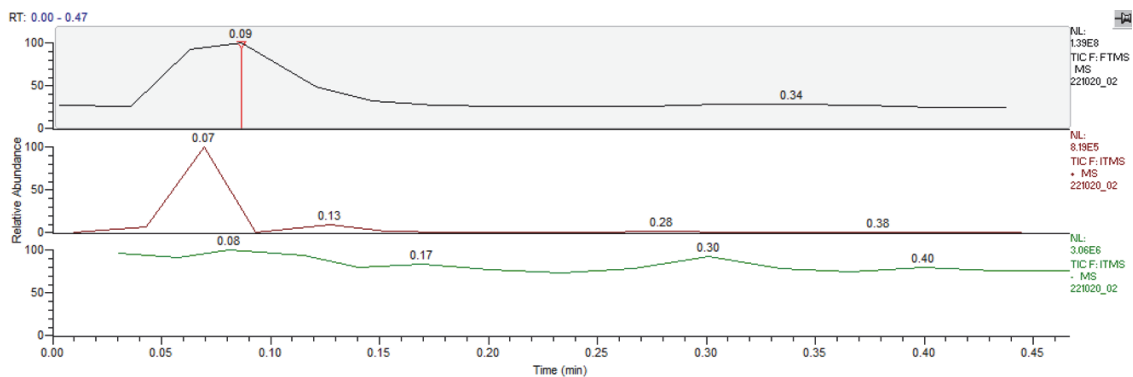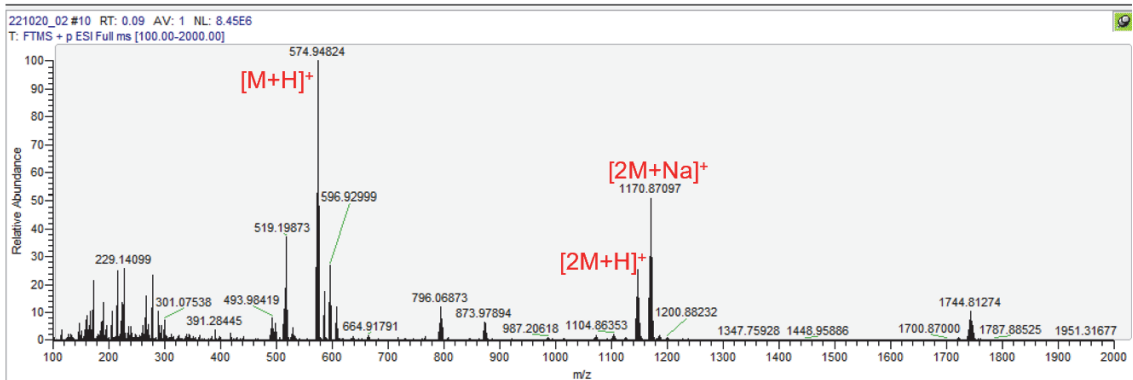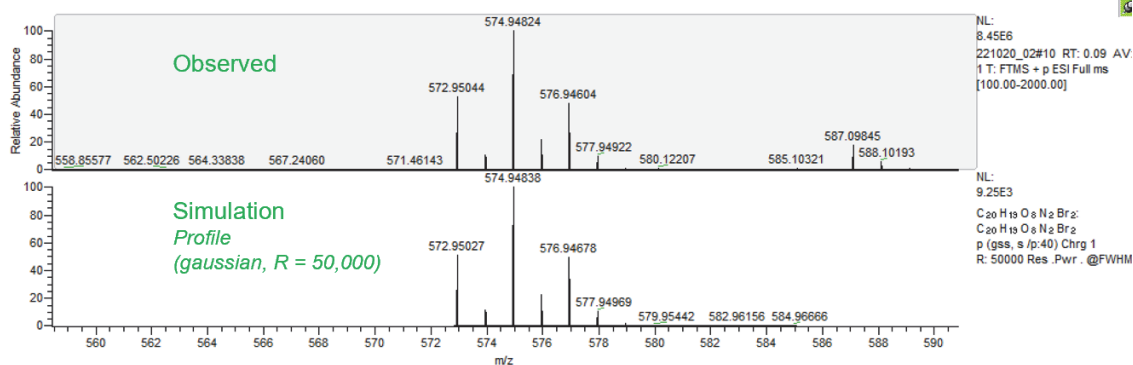

Fig. S22 HRMS spectrum of 6.



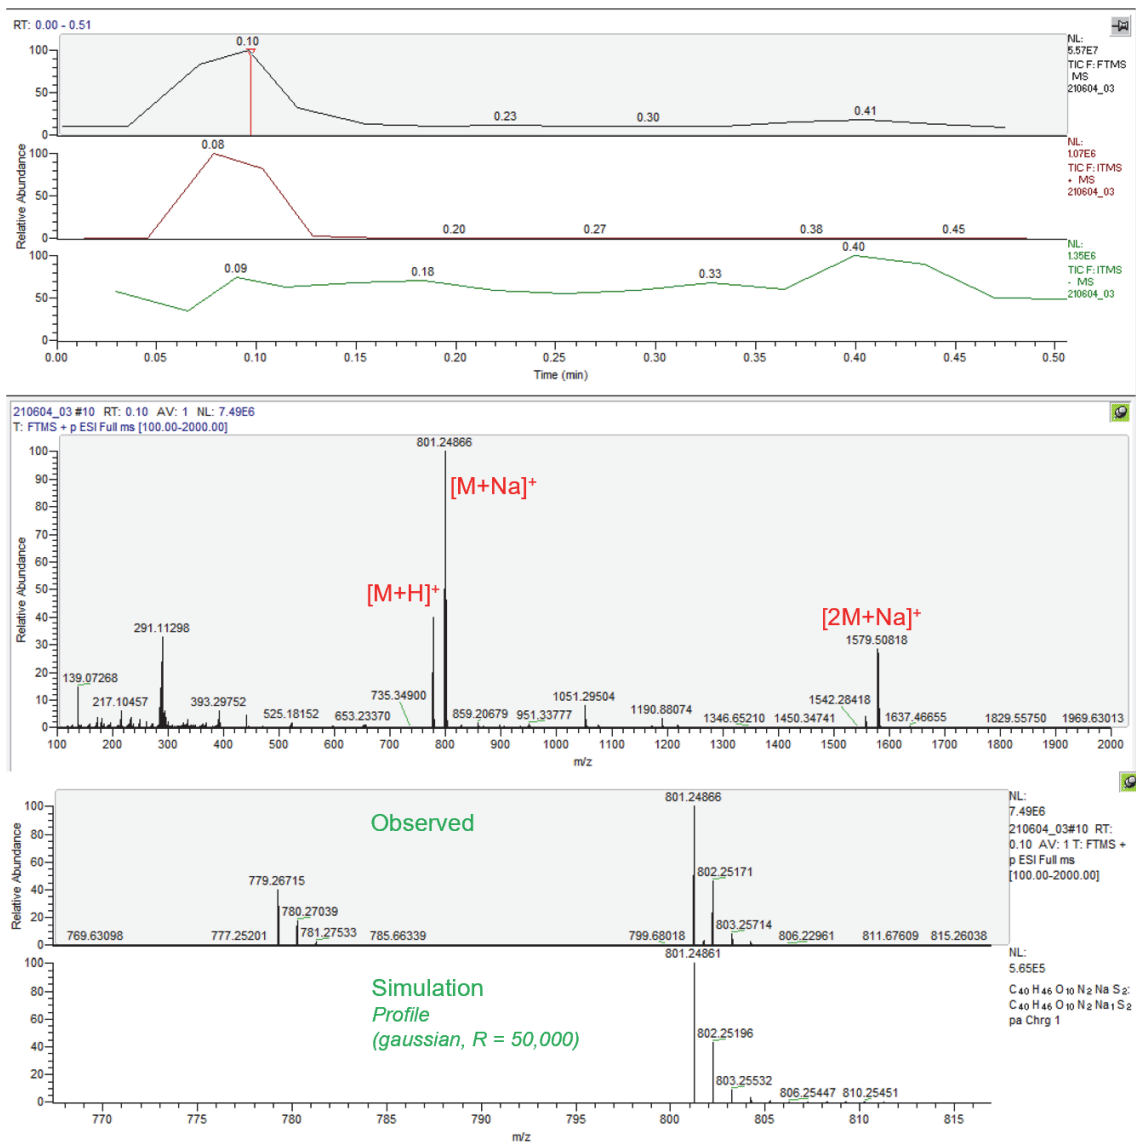

Fig. S23 HRMS spectrum of 7.

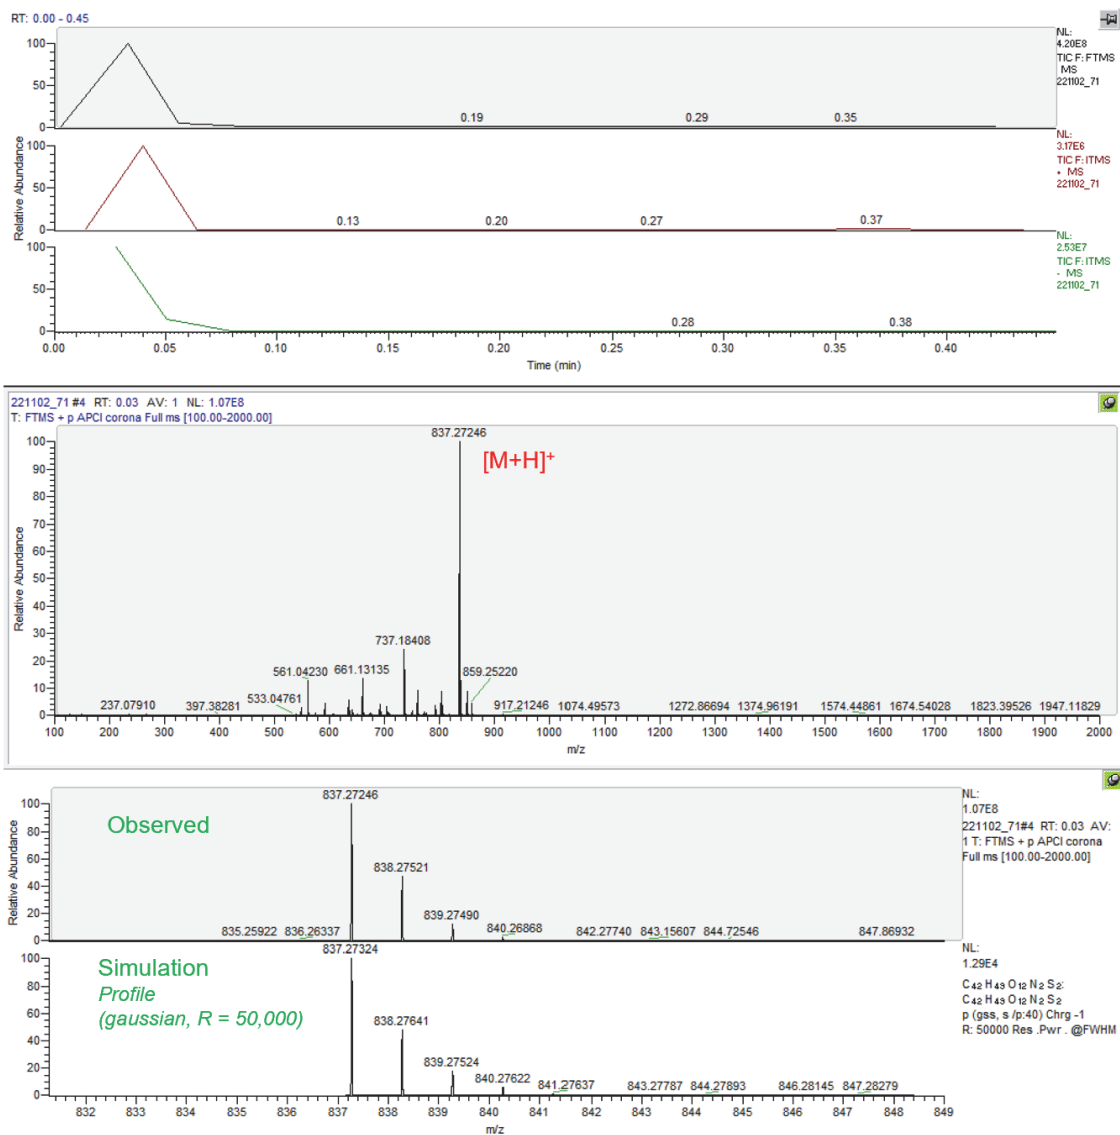

Fig. S24 HRMS spectrum of **8**.

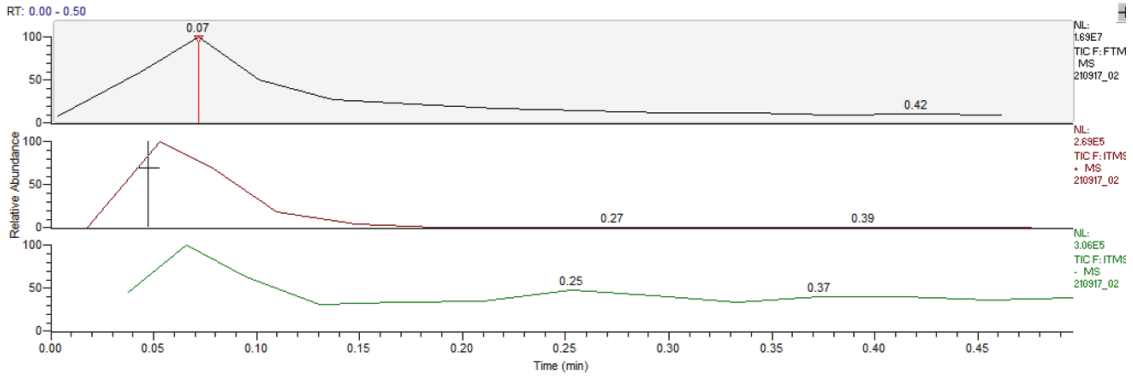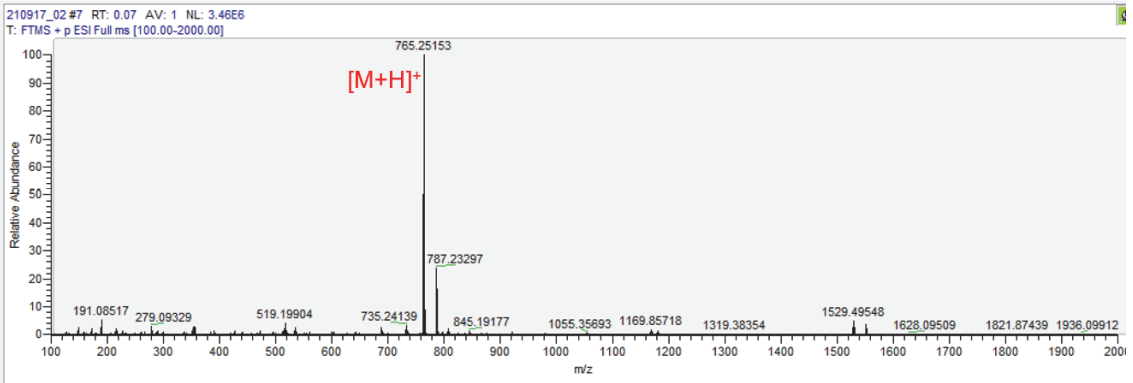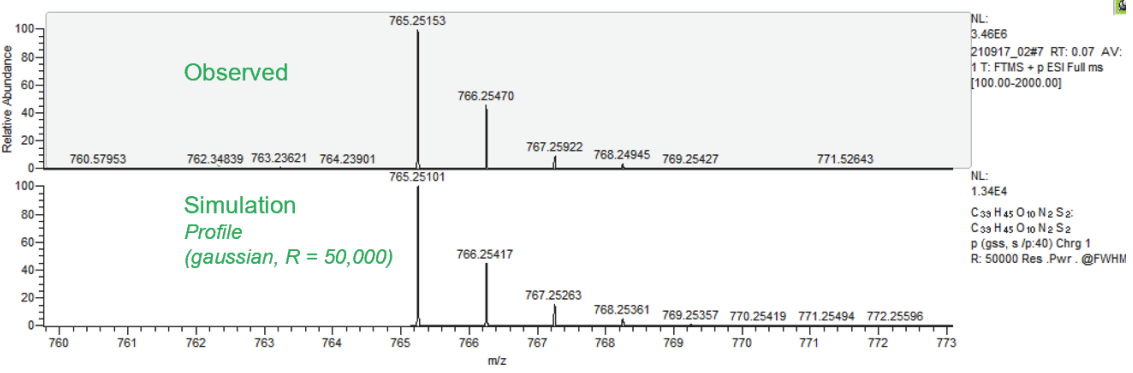

Fig. S25 HRMS spectrum of **9**.

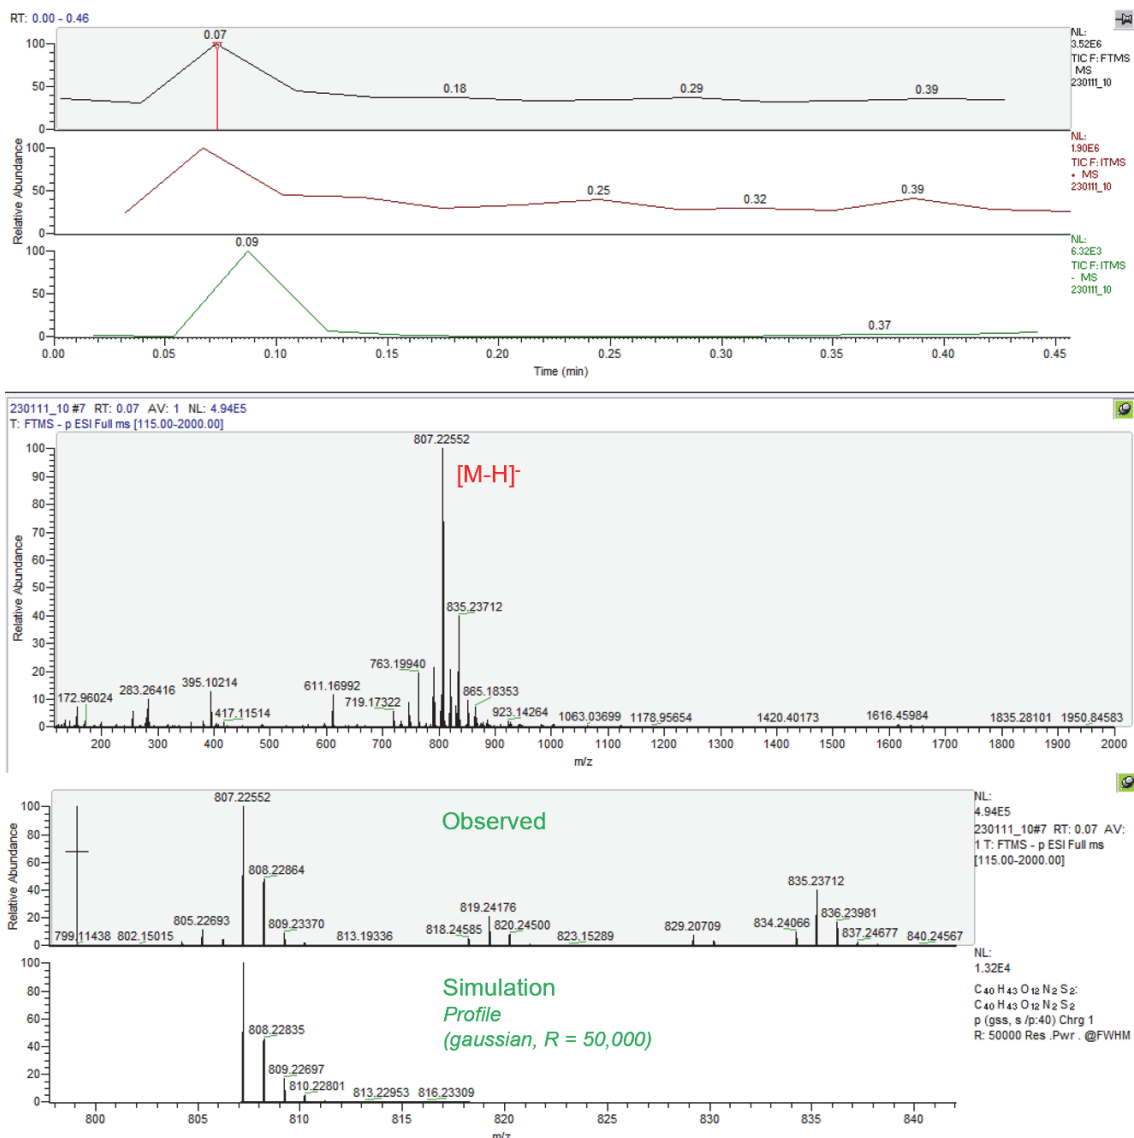

Fig. S26 HRMS spectrum of 10.

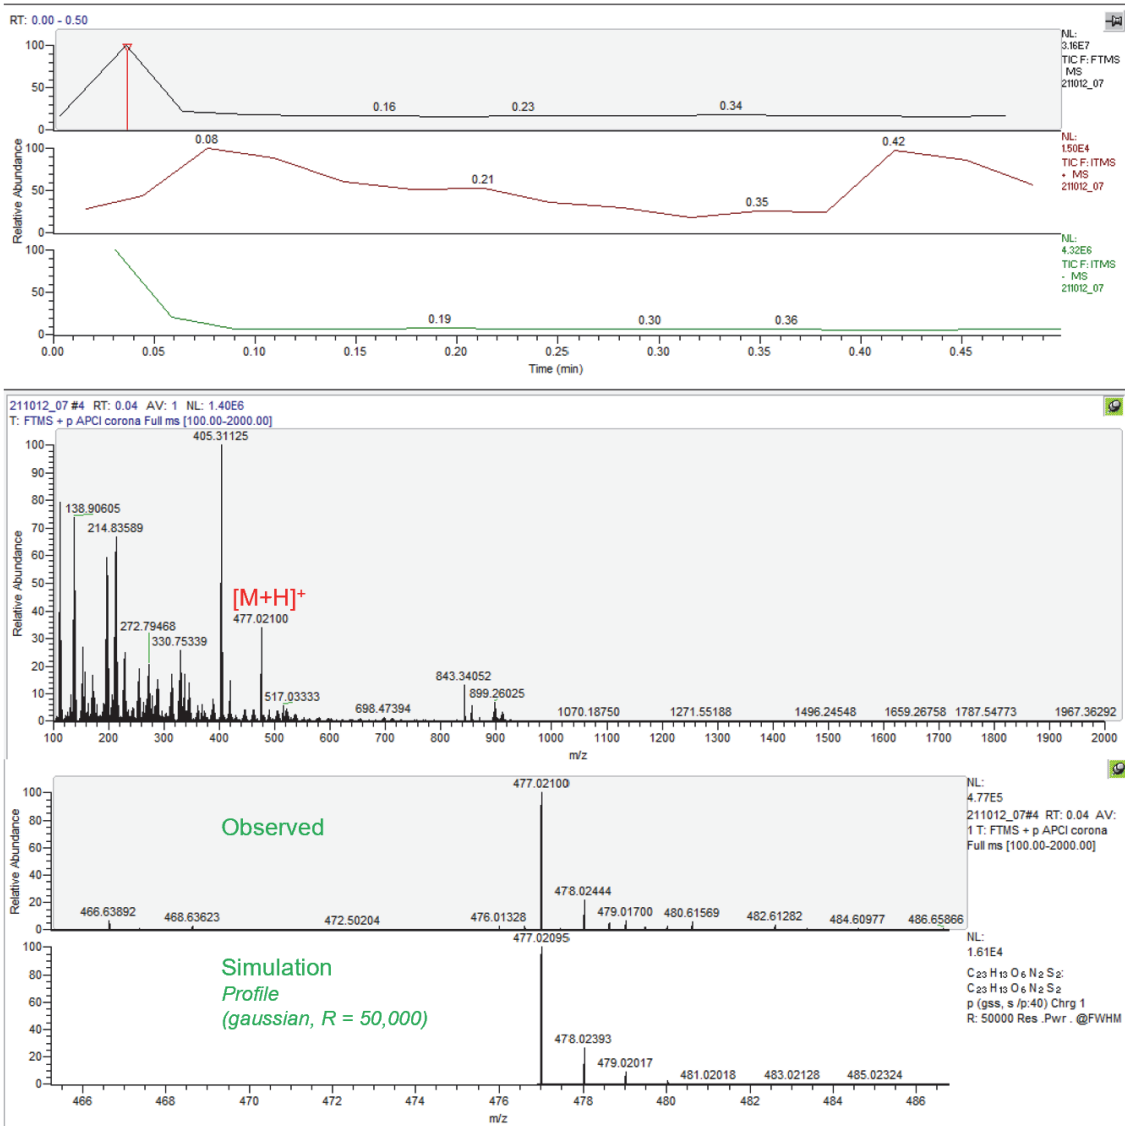

Fig. S27 HRMS spectrum of KY-1.

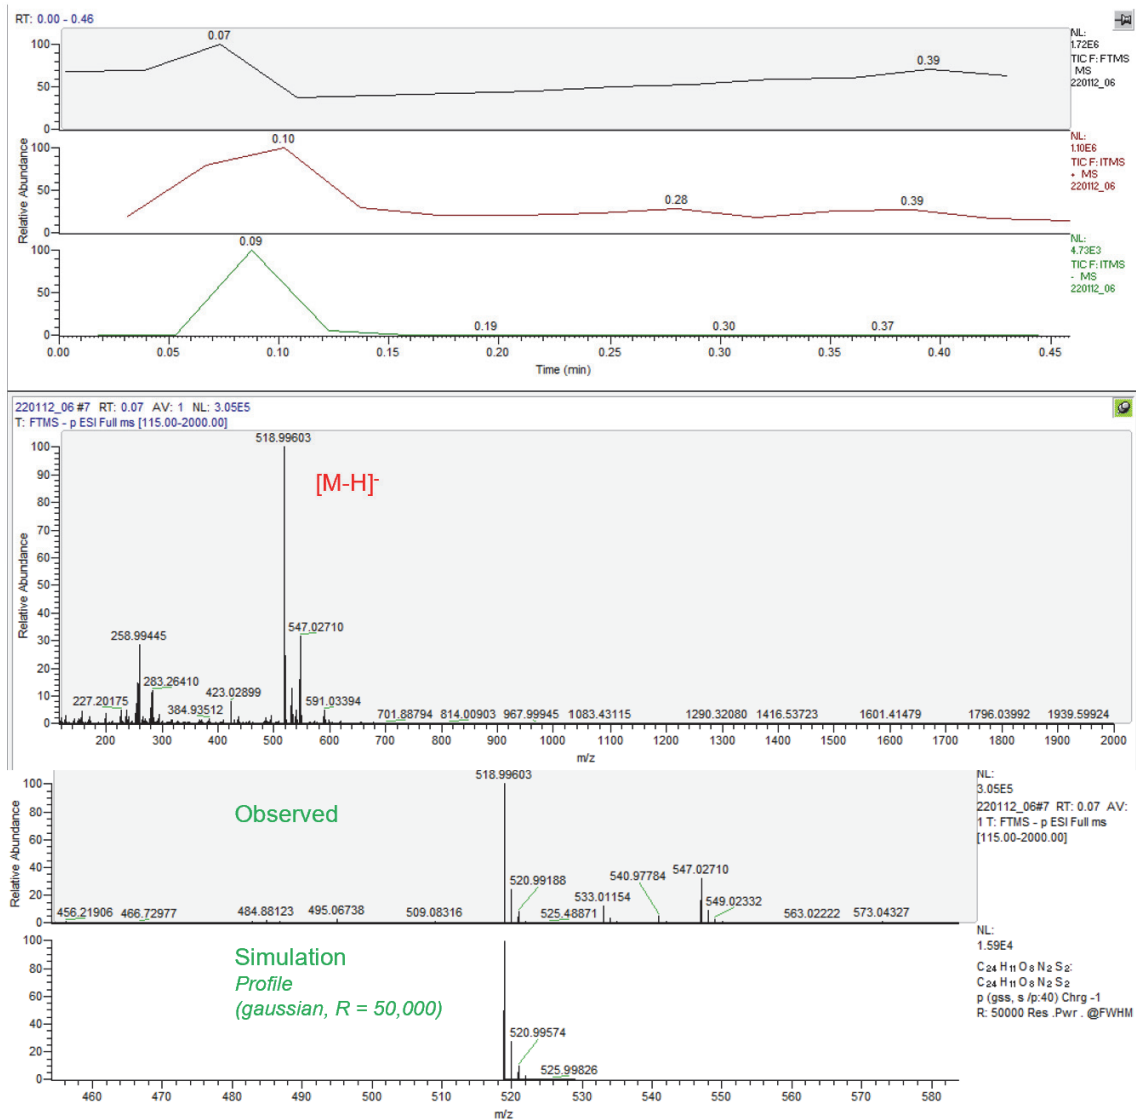

Fig. S28 HRMS spectrum of KY-2.

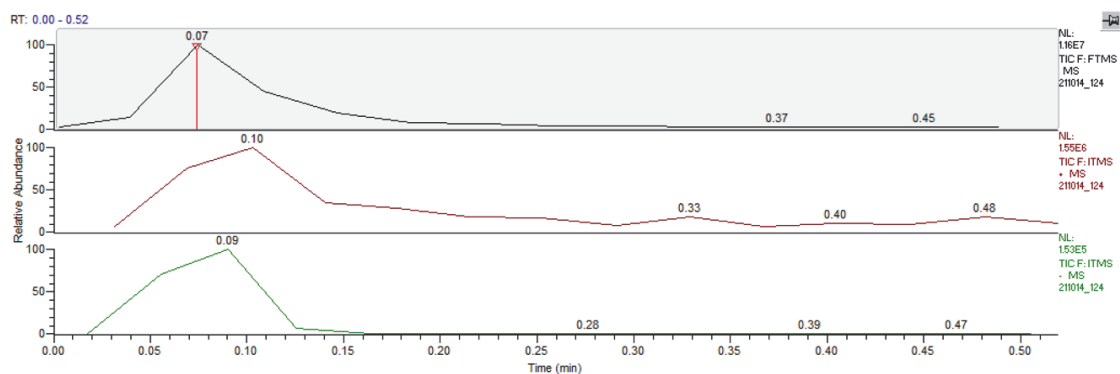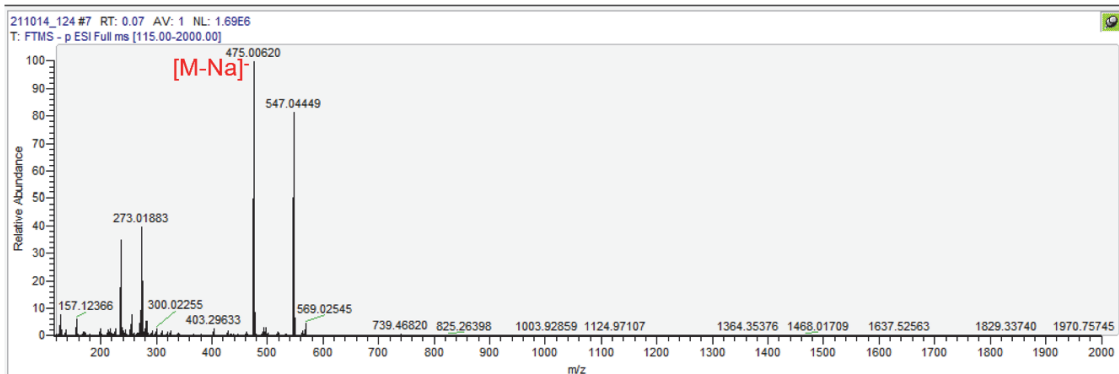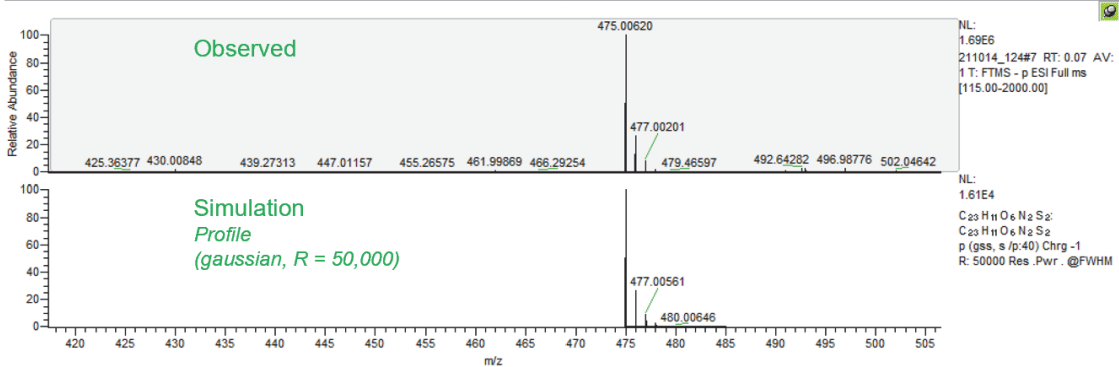

Fig. S29 HRMS spectrum of KY-1Na.

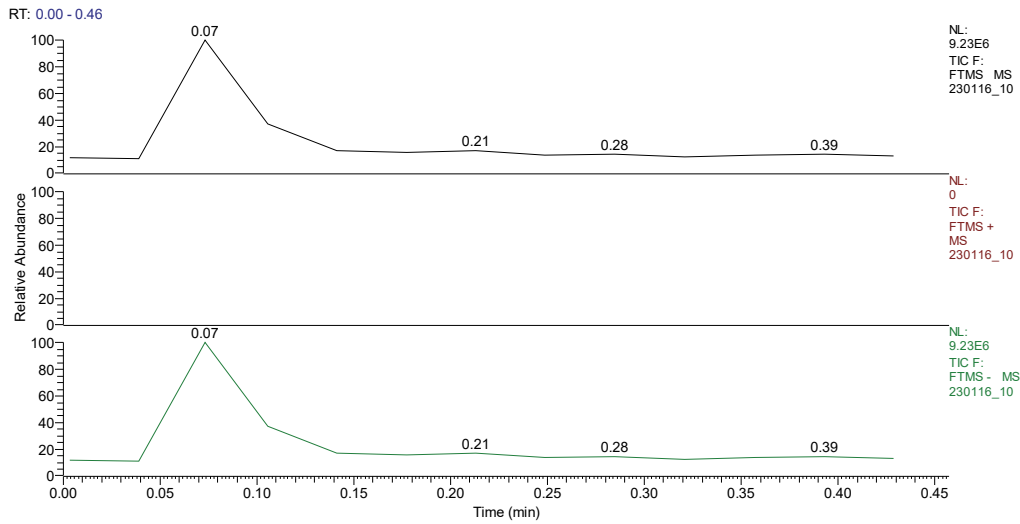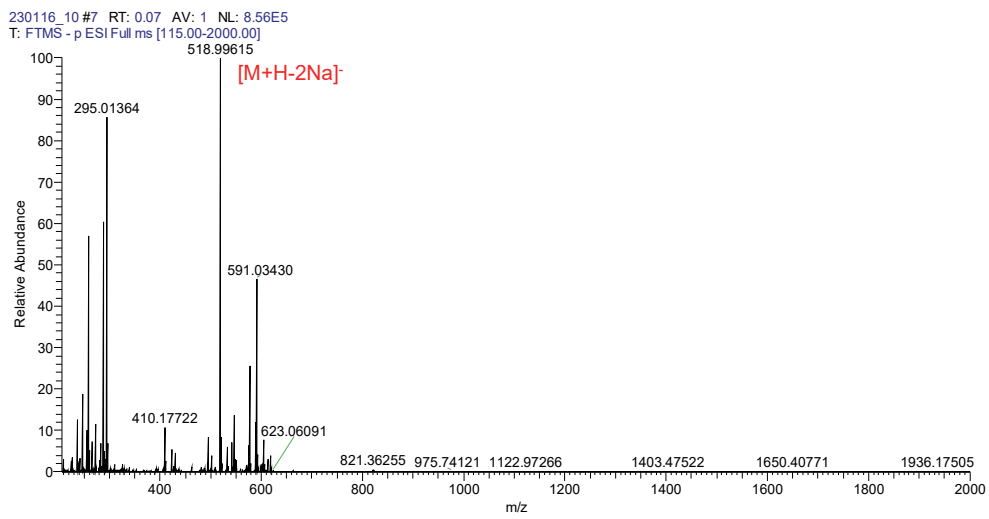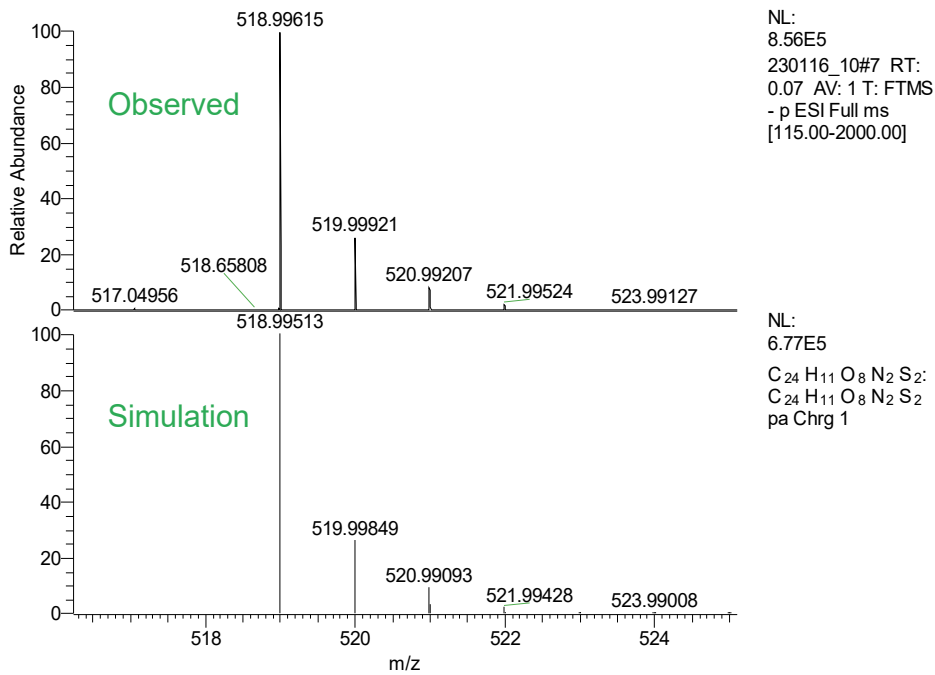

Fig. S30 HRMS spectrum of KY-2Na.



## IR spectra

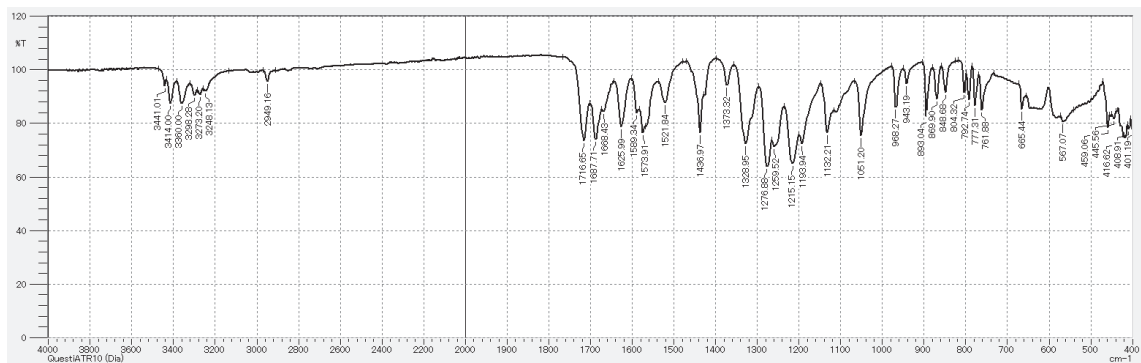

Fig. S31 FT-IR (ATR) spectrum of 1.

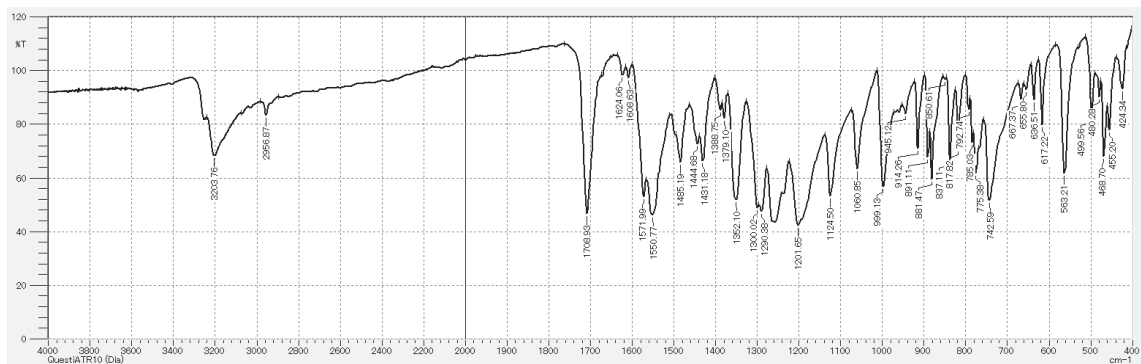

Fig. S32 FT-IR (ATR) spectrum of 3.

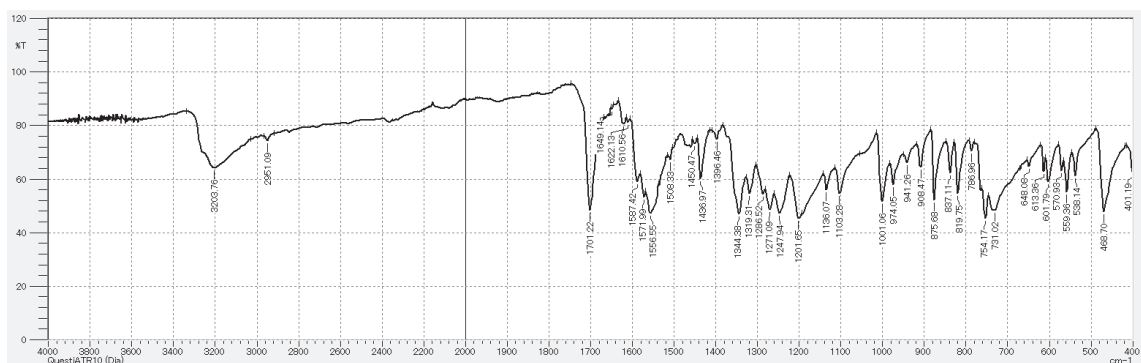

Fig. S33 FT-IR (ATR) spectrum of 4.

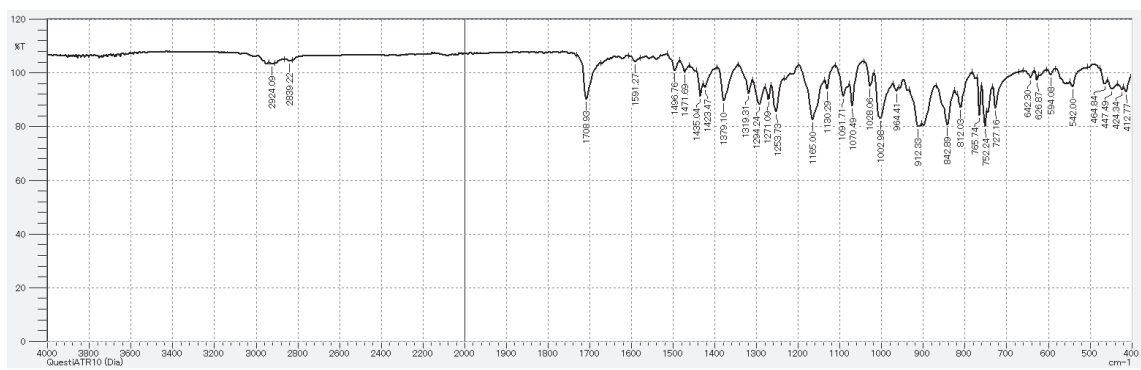

Fig. S34 FT-IR (ATR) spectrum of 5.

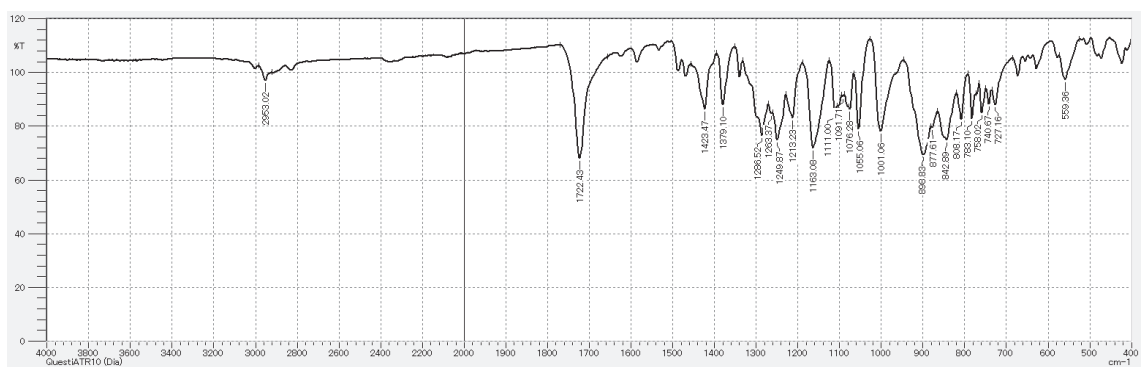

Fig. S35 FT-IR (ATR) spectrum of 6.

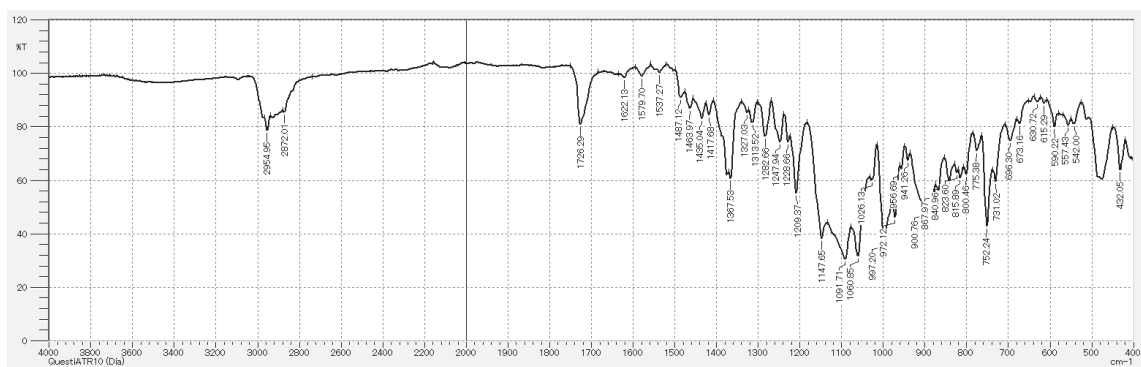

Fig. S36 FT-IR (ATR) spectrum of 7.

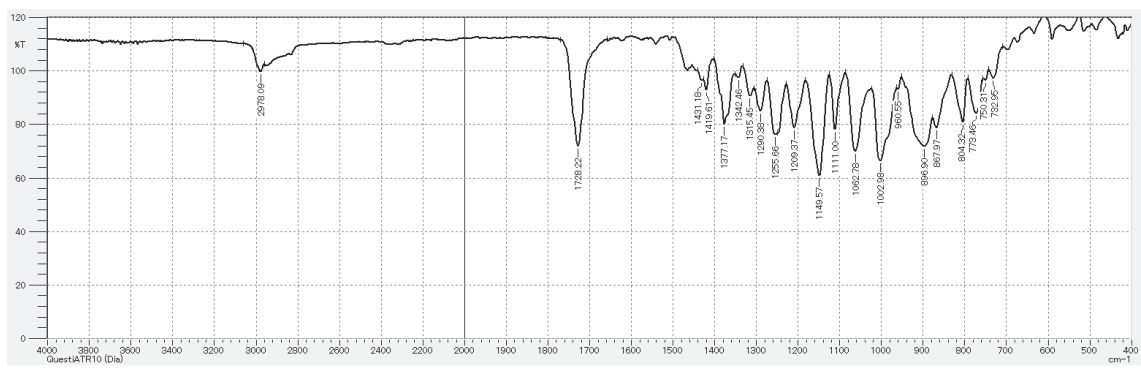

**Fig. S37** FT-IR (ATR) spectrum of **8**.

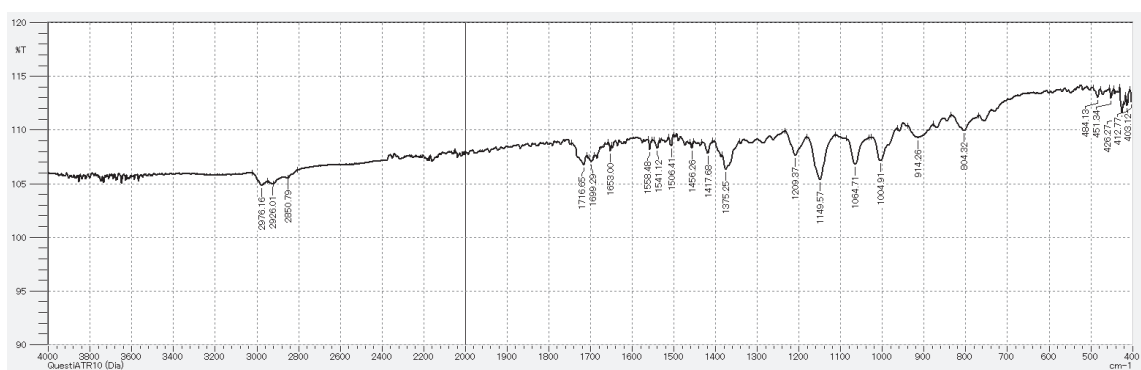

**Fig. S38** FT-IR (ATR) spectrum of **9**.

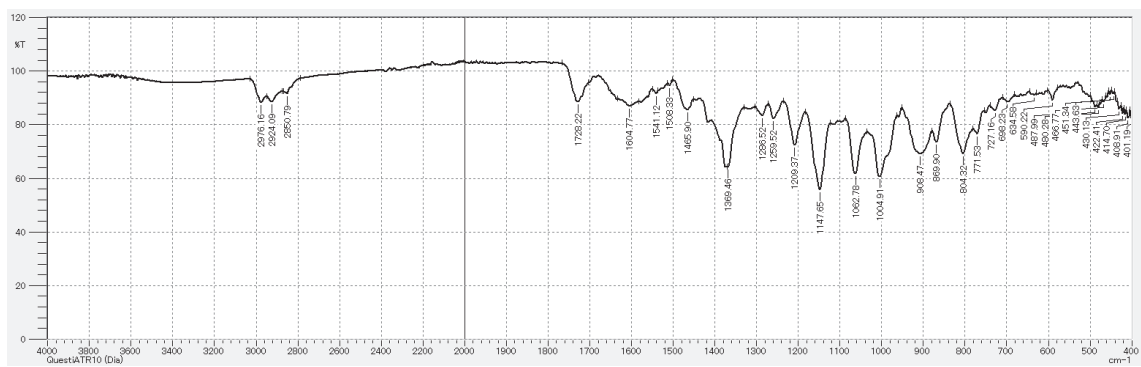

**Fig. S39** FT-IR (ATR) spectrum of **10**.

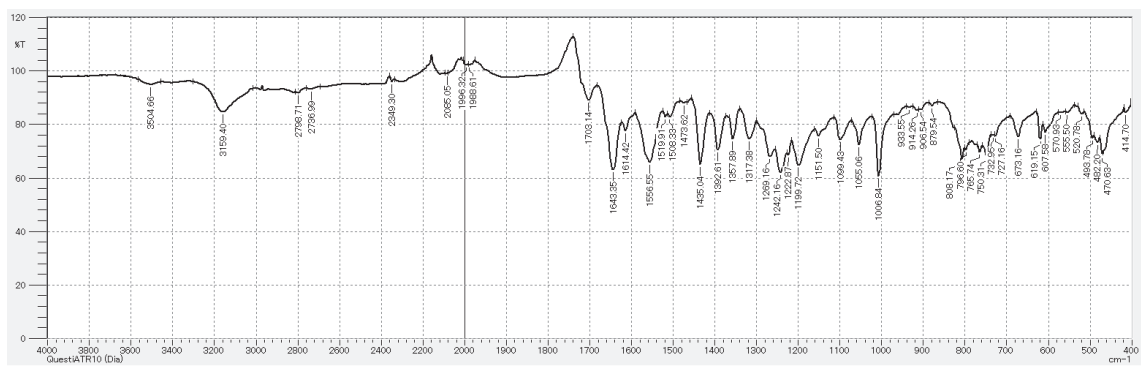

**Fig. S40** FT-IR (ATR) spectrum of **KY-1**.

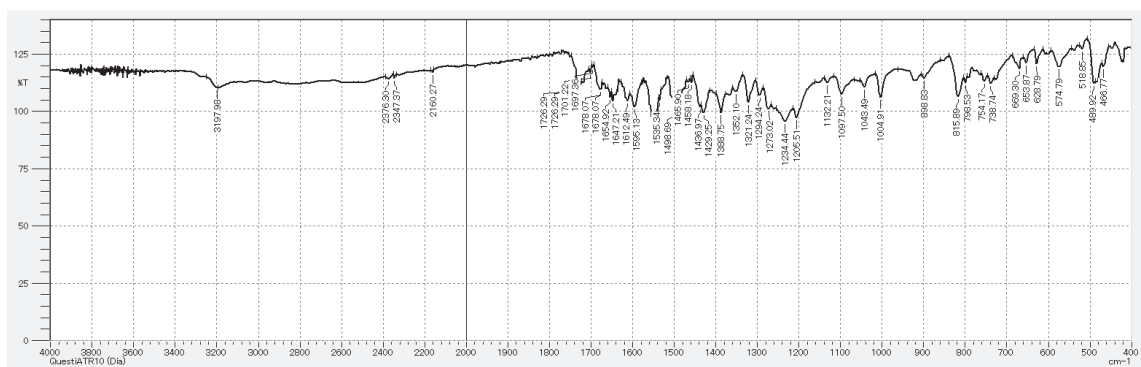

**Fig. S41** FT-IR (ATR) spectrum of **KY-2**.

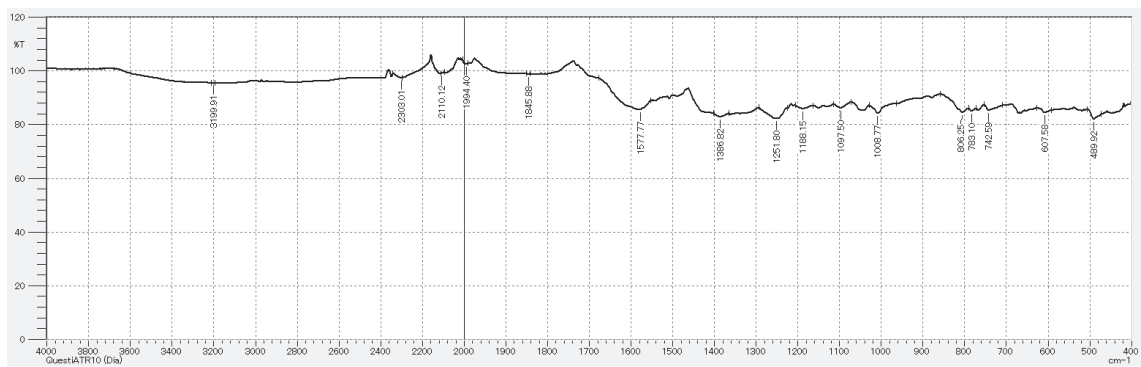

**Fig. S42** FT-IR (ATR) spectrum of **KY-1Na**.

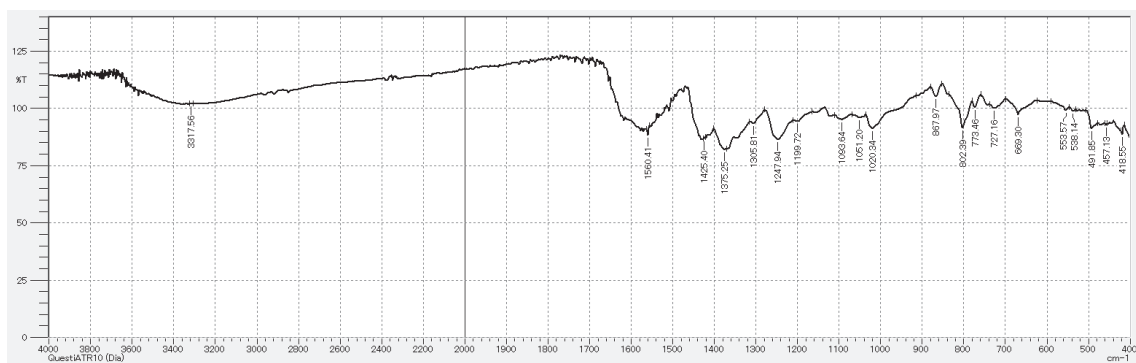

**Fig. S43** FT-IR (ATR) spectrum of **KY-2Na**.

## Theoretical calculations

**Table S1** Geometrical coordinates of the optimized **KY-1** by DFT at the B3LYP/6-311G(d,p)/DMSO-IEFPCM level.

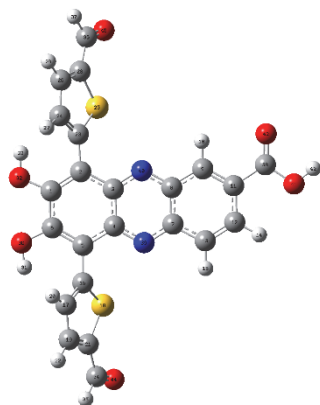

| Tag | Symbol | X        | Y        | Z        | Tag | Symbol | X        | Y        | Z        |
|-----|--------|----------|----------|----------|-----|--------|----------|----------|----------|
| 1   | C      | 0.049219 | -2.78741 | -0.29891 | 24  | C      | 3.064042 | -2.911   | -1.2159  |
| 2   | C      | 0.976895 | -1.7674  | -0.29557 | 25  | S      | 3.500757 | -1.54679 | 0.935995 |
| 3   | C      | 0.510161 | -0.40418 | -0.27356 | 26  | C      | 4.433192 | -3.09246 | -0.9187  |
| 4   | C      | -0.91449 | -0.12938 | -0.27792 | 27  | H      | 2.575224 | -3.33263 | -2.08463 |
| 5   | C      | -1.85167 | -1.22112 | -0.30481 | 28  | C      | 4.825965 | -2.42356 | 0.219443 |
| 6   | C      | -1.36845 | -2.51342 | -0.3031  | 29  | H      | 5.111988 | -3.68351 | -1.51969 |
| 7   | C      | -0.47503 | 2.122418 | -0.25472 | 30  | O      | -2.14384 | -3.61184 | -0.2816  |
| 8   | C      | 0.932359 | 1.850184 | -0.25156 | 31  | H      | -3.07537 | -3.34877 | -0.22542 |
| 9   | C      | 1.848047 | 2.932966 | -0.23933 | 32  | O      | 0.358847 | -4.09679 | -0.27479 |
| 10  | H      | 2.909688 | 2.722665 | -0.23864 | 33  | H      | 1.320483 | -4.19993 | -0.20787 |
| 11  | C      | 1.388719 | 4.22917  | -0.2286  | 34  | C      | -6.90546 | 0.104949 | 0.76317  |
| 12  | C      | -0.01357 | 4.499215 | -0.23116 | 35  | H      | -7.81532 | -0.16684 | 0.19495  |
| 13  | C      | -0.91932 | 3.474629 | -0.2446  | 36  | C      | 6.159339 | -2.38851 | 0.797715 |
| 14  | H      | -0.35069 | 5.526593 | -0.22304 | 37  | H      | 6.90605  | -2.98642 | 0.241382 |
| 15  | H      | -1.98613 | 3.66171  | -0.24827 | 38  | C      | 2.395684 | 5.327822 | -0.21567 |
| 16  | C      | -3.30667 | -0.99503 | -0.3275  | 39  | N      | -1.37123 | 1.119979 | -0.27283 |
| 17  | C      | -4.20611 | -1.4985  | -1.24971 | 40  | N      | 1.395548 | 0.58594  | -0.26579 |
| 18  | S      | -4.12503 | -0.09935 | 0.922398 | 41  | O      | 1.831021 | 6.551115 | -0.20595 |
| 19  | C      | -5.54781 | -1.16418 | -0.95904 | 42  | H      | 2.54768  | 7.204211 | -0.19826 |
| 20  | H      | -3.90071 | -2.06034 | -2.12295 | 43  | O      | 3.595567 | 5.162559 | -0.21407 |
| 21  | C      | -5.67465 | -0.41294 | 0.188325 | 44  | O      | -6.97128 | 0.778197 | 1.776422 |
| 22  | H      | -6.39214 | -1.45403 | -1.57088 | 45  | O      | 6.46627  | -1.77132 | 1.802298 |
| 23  | C      | 2.412049 | -2.09583 | -0.30817 |     |        |          |          |          |

**Table S2** Geometrical coordinates of the optimized **KY-1Na** by DFT at the B3LYP/6-311+G(d,p)/DMSO-IEFPCM level.

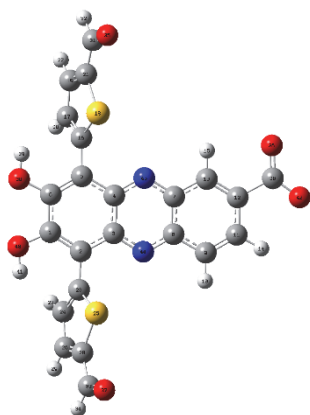

| Tag | Symbol | X        | Y        | Z        | Tag | Symbol | X        | Y        | Z        |
|-----|--------|----------|----------|----------|-----|--------|----------|----------|----------|
| 1   | C      | 1.324116 | -2.46013 | -0.42434 | 23  | C      | 3.277859 | -0.95894 | -0.37063 |
| 2   | C      | 1.818323 | -1.17524 | -0.37389 | 24  | C      | 4.171151 | -1.26847 | -1.37723 |
| 3   | C      | 0.897828 | -0.06998 | -0.32452 | 25  | S      | 4.097156 | -0.31329 | 1.025061 |
| 4   | C      | -0.52531 | -0.3257  | -0.32106 | 26  | C      | 5.512414 | -0.97681 | -1.0382  |
| 5   | C      | -1.00316 | -1.68243 | -0.37069 | 27  | H      | 3.862484 | -1.66704 | -2.33491 |
| 6   | C      | -0.0939  | -2.71463 | -0.42568 | 28  | C      | 5.644114 | -0.45314 | 0.230815 |
| 7   | C      | -0.92839 | 1.933995 | -0.2613  | 29  | H      | 6.354942 | -1.13737 | -1.69861 |
| 8   | C      | 0.48705  | 2.187006 | -0.26687 | 30  | C      | -2.34965 | 5.509544 | -0.15255 |
| 9   | C      | 0.941772 | 3.536288 | -0.23864 | 31  | C      | -6.13263 | -2.42655 | 0.895031 |
| 10  | H      | 2.010668 | 3.717153 | -0.24474 | 32  | H      | -6.93064 | -2.84608 | 0.255516 |
| 11  | C      | 0.039347 | 4.564971 | -0.2029  | 33  | C      | 6.883248 | -0.04853 | 0.868732 |
| 12  | C      | -1.37001 | 4.325939 | -0.19481 | 34  | H      | 7.780781 | -0.19876 | 0.241233 |
| 13  | C      | -1.83139 | 3.032679 | -0.22553 | 35  | O      | -6.36814 | -2.07413 | 2.040751 |
| 14  | H      | 0.375457 | 5.593611 | -0.17981 | 36  | O      | -3.57578 | 5.230221 | -0.14661 |
| 15  | H      | -2.89557 | 2.834176 | -0.22154 | 37  | O      | 6.976275 | 0.418636 | 1.993745 |
| 16  | C      | -2.4477  | -1.98582 | -0.36533 | 38  | O      | -0.43542 | -4.02097 | -0.45863 |
| 17  | C      | -3.19062 | -2.5367  | -1.38999 | 39  | H      | -1.40081 | -4.10488 | -0.44076 |
| 18  | S      | -3.42334 | -1.7246  | 1.054577 | 40  | O      | 2.097852 | -3.5666  | -0.45009 |
| 19  | C      | -4.54714 | -2.73833 | -1.0454  | 41  | H      | 3.032236 | -3.31052 | -0.42086 |
| 20  | H      | -2.77242 | -2.76304 | -2.36209 | 42  | O      | -1.83531 | 6.658185 | -0.12715 |
| 21  | C      | -4.83695 | -2.3499  | 0.245685 | 43  | N      | -1.4035  | 0.675667 | -0.29483 |
| 22  | H      | -5.29066 | -3.14797 | -1.71709 | 44  | N      | 1.371274 | 1.175686 | -0.30386 |

**Table S3** Geometrical coordinates of the optimized **KY-1Na** by DFT at the B3LYP/6-311+G(d,p)/Water-IEFPCM level.

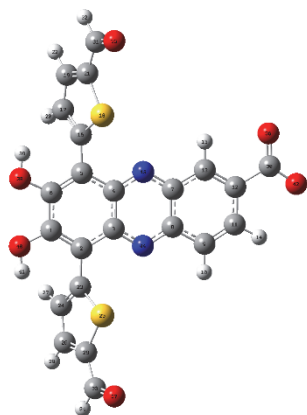

| Tag | Symbol | X        | Y        | Z        | Tag | Symbol | X        | Y        | Z        |
|-----|--------|----------|----------|----------|-----|--------|----------|----------|----------|
| 1   | C      | 1.327674 | -2.45807 | -0.4257  | 23  | C      | 3.279216 | -0.95396 | -0.37185 |
| 2   | C      | 1.819953 | -1.17251 | -0.37484 | 24  | C      | 4.172251 | -1.25729 | -1.3804  |
| 3   | C      | 0.898002 | -0.06867 | -0.32479 | 25  | S      | 4.098278 | -0.31359 | 1.026532 |
| 4   | C      | -0.52494 | -0.32652 | -0.32159 | 26  | C      | 5.513317 | -0.96497 | -1.04086 |
| 5   | C      | -1.00088 | -1.6839  | -0.37124 | 27  | H      | 3.863548 | -1.65259 | -2.33941 |
| 6   | C      | -0.09008 | -2.71478 | -0.42646 | 28  | C      | 5.645014 | -0.44695 | 0.23042  |
| 7   | C      | -0.93105 | 1.93268  | -0.2615  | 29  | H      | 6.355661 | -1.12131 | -1.70251 |
| 8   | C      | 0.483887 | 2.187739 | -0.26599 | 30  | C      | -2.35767 | 5.50577  | -0.15341 |
| 9   | C      | 0.936596 | 3.537686 | -0.23649 | 31  | C      | -6.12912 | -2.43084 | 0.896693 |
| 10  | H      | 2.005208 | 3.720234 | -0.24163 | 32  | H      | -6.92689 | -2.85336 | 0.25895  |
| 11  | C      | 0.032718 | 4.565127 | -0.20092 | 33  | C      | 6.883696 | -0.04349 | 0.869747 |
| 12  | C      | -1.37626 | 4.324012 | -0.19463 | 34  | H      | 7.781342 | -0.18974 | 0.241598 |
| 13  | C      | -1.83567 | 3.030015 | -0.22628 | 35  | O      | -6.36481 | -2.07444 | 2.041313 |
| 14  | H      | 0.367638 | 5.594131 | -0.17677 | 36  | O      | -3.58364 | 5.224945 | -0.15264 |
| 15  | H      | -2.89956 | 2.829796 | -0.22369 | 37  | O      | 6.976174 | 0.418914 | 1.996905 |
| 16  | C      | -2.44498 | -1.98913 | -0.3653  | 38  | O      | -0.42932 | -4.02154 | -0.45915 |
| 17  | C      | -3.18742 | -2.54311 | -1.38862 | 39  | H      | -1.39454 | -4.10762 | -0.4408  |
| 18  | S      | -3.42052 | -1.72615 | 1.054304 | 40  | O      | 2.10297  | -3.56318 | -0.45253 |
| 19  | C      | -4.54365 | -2.74566 | -1.04331 | 41  | H      | 3.037131 | -3.30603 | -0.42474 |
| 20  | H      | -2.76925 | -2.77129 | -2.3603  | 42  | O      | -1.84573 | 6.655458 | -0.12347 |
| 21  | C      | -4.83379 | -2.35471 | 0.246921 | 43  | N      | -1.40442 | 0.673665 | -0.29554 |
| 22  | H      | -5.28669 | -3.15772 | -1.71405 | 44  | N      | 1.369603 | 1.177672 | -0.30319 |



**Table S4** Geometrical coordinates of the optimized **KY-2** by DFT at the B3LYP/6-311G(d,p)/DMSO-IEFPCM level.

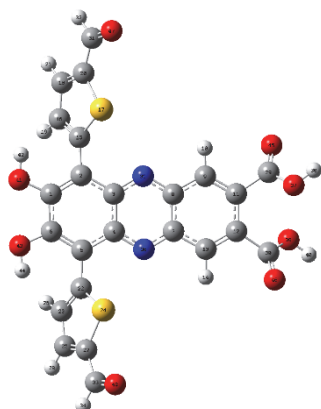

| Tag | Symbol | X        | Y        | Z        | Tag | Symbol | X        | Y        | Z        |
|-----|--------|----------|----------|----------|-----|--------|----------|----------|----------|
| 1   | C      | -0.71706 | -3.22259 | -0.33162 | 25  | C      | 5.094198 | -2.65832 | -0.93878 |
| 2   | C      | -1.43728 | -2.04623 | -0.31897 | 26  | H      | 3.322255 | -3.20678 | -2.13534 |
| 3   | C      | -0.72401 | -0.79723 | -0.27893 | 27  | C      | 5.344711 | -1.97135 | 0.228279 |
| 4   | C      | 0.728255 | -0.79539 | -0.27567 | 28  | H      | 5.877353 | -3.08505 | -1.55194 |
| 5   | C      | 1.444593 | -2.04267 | -0.30929 | 29  | C      | -1.54206 | 5.158975 | 0.053926 |
| 6   | C      | 0.727484 | -3.22073 | -0.32636 | 30  | C      | 1.530868 | 5.172374 | -0.34031 |
| 7   | C      | 0.713935 | 1.495304 | -0.22739 | 31  | C      | -6.64592 | -1.7161  | 0.772551 |
| 8   | C      | -0.71545 | 1.493487 | -0.22892 | 32  | H      | -7.49107 | -2.14293 | 0.200041 |
| 9   | C      | -1.40679 | 2.733283 | -0.1841  | 33  | C      | 6.643248 | -1.70475 | 0.825942 |
| 10  | H      | -2.48845 | 2.72053  | -0.1436  | 34  | H      | 7.494092 | -2.12518 | 0.25714  |
| 11  | C      | -0.72199 | 3.922123 | -0.14525 | 35  | N      | -1.40905 | 0.342122 | -0.25941 |
| 12  | C      | 0.714147 | 3.925259 | -0.19959 | 36  | N      | 1.410527 | 0.345719 | -0.2571  |
| 13  | C      | 1.402017 | 2.737714 | -0.21741 | 37  | O      | -0.9666  | 6.01388  | 0.917542 |
| 14  | H      | 2.483602 | 2.729488 | -0.26062 | 38  | H      | -1.53992 | 6.792848 | 0.994615 |
| 15  | C      | -2.90906 | -2.09936 | -0.33856 | 39  | O      | 0.955382 | 6.063199 | -1.16688 |
| 16  | C      | -3.69994 | -2.74711 | -1.26981 | 40  | H      | 1.526428 | 6.846619 | -1.20696 |
| 17  | S      | -3.87713 | -1.39674 | 0.927617 | 41  | O      | -1.26733 | -4.44849 | -0.32604 |
| 18  | C      | -5.07983 | -2.67648 | -0.97351 | 42  | H      | -2.23219 | -4.37017 | -0.26932 |
| 19  | H      | -3.29677 | -3.22644 | -2.15243 | 43  | O      | 1.281094 | -4.44506 | -0.31606 |
| 20  | C      | -5.34191 | -1.98285 | 0.187072 | 44  | H      | 2.245414 | -4.3639  | -0.25442 |
| 21  | H      | -5.85655 | -3.10956 | -1.5904  | 45  | O      | -2.62813 | 5.34446  | -0.44212 |
| 22  | C      | 2.916679 | -2.09216 | -0.31783 | 46  | O      | 2.614702 | 5.338894 | 0.167146 |
| 23  | C      | 3.716896 | -2.7315  | -1.2467  | 47  | O      | -6.83192 | -1.08634 | 1.798578 |
| 24  | S      | 3.872076 | -1.3951  | 0.960999 | 48  | O      | 6.81929  | -1.08144 | 1.857617 |

**Table S5** Geometrical coordinates of the optimized **KY-2Na** by DFT at the B3LYP/6-311+G(d,p)/DMSO-IEFPCM level.

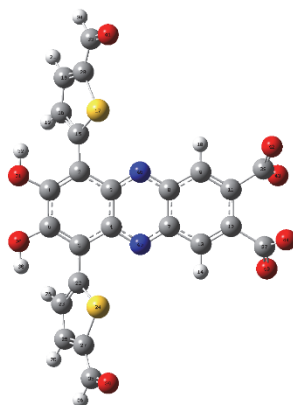

| Tag | Symbol | X        | Y        | Z        | Tag | Symbol | X        | Y        | Z        |
|-----|--------|----------|----------|----------|-----|--------|----------|----------|----------|
| 1   | C      | -0.69852 | -3.15761 | -0.41316 | 24  | S      | 3.842615 | -1.4827  | 1.029942 |
| 2   | C      | -1.41927 | -1.9836  | -0.36417 | 25  | C      | 5.11688  | -2.41817 | -1.01991 |
| 3   | C      | -0.71612 | -0.72894 | -0.31224 | 26  | H      | 3.369334 | -2.83302 | -2.3057  |
| 4   | C      | 0.727086 | -0.71989 | -0.30539 | 27  | C      | 5.340292 | -1.90341 | 0.240021 |
| 5   | C      | 1.445492 | -1.96574 | -0.35705 | 28  | H      | 5.917322 | -2.73258 | -1.67738 |
| 6   | C      | 0.739435 | -3.14843 | -0.41102 | 29  | O      | 1.314824 | -4.37222 | -0.43746 |
| 7   | C      | 0.709905 | 1.575027 | -0.23814 | 30  | H      | 2.278773 | -4.27771 | -0.40761 |
| 8   | C      | -0.72797 | 1.566016 | -0.24845 | 31  | O      | -1.25821 | -4.38878 | -0.43879 |
| 9   | C      | -1.4202  | 2.80771  | -0.21507 | 32  | H      | -2.22333 | -4.30651 | -0.41069 |
| 10  | H      | -2.50414 | 2.784997 | -0.2272  | 33  | C      | -6.61021 | -1.77844 | 0.854692 |
| 11  | C      | -0.74611 | 4.003387 | -0.17204 | 34  | H      | -7.46179 | -2.10566 | 0.230387 |
| 12  | C      | 0.695748 | 4.012346 | -0.15578 | 35  | C      | 6.63237  | -1.70885 | 0.8705   |
| 13  | C      | 1.385832 | 2.82548  | -0.19447 | 36  | H      | 7.488211 | -2.02222 | 0.244912 |
| 14  | H      | 2.47007  | 2.815864 | -0.18354 | 37  | C      | 1.480863 | 5.314187 | 0.003001 |
| 15  | C      | -2.89335 | -2.03725 | -0.36387 | 38  | C      | -1.55091 | 5.301609 | -0.23677 |
| 16  | C      | -3.71129 | -2.53063 | -1.36179 | 39  | O      | 6.809379 | -1.24708 | 1.987828 |
| 17  | S      | -3.82358 | -1.51889 | 1.015398 | 40  | O      | 2.349997 | 5.571369 | -0.86742 |
| 18  | C      | -5.08443 | -2.48317 | -1.02932 | 41  | O      | -6.79364 | -1.31141 | 1.96879  |
| 19  | H      | -3.33086 | -2.88668 | -2.31039 | 42  | O      | -2.42972 | 5.474686 | 0.644763 |
| 20  | C      | -5.31529 | -1.96233 | 0.226778 | 43  | O      | -1.28466 | 6.055669 | -1.20711 |
| 21  | H      | -5.88041 | -2.81124 | -1.68552 | 44  | O      | 1.207579 | 5.985396 | 1.030666 |
| 22  | C      | 2.920132 | -2.00205 | -0.35401 | 45  | N      | 1.407643 | 0.428019 | -0.27428 |
| 23  | C      | 3.744778 | -2.47902 | -1.35435 | 46  | N      | -1.41092 | 0.410538 | -0.29299 |

**Table S6** Geometrical coordinates of the optimized **KY-2Na** by DFT at the B3LYP/6-311+G(d,p)/Water-IEFPCM level.

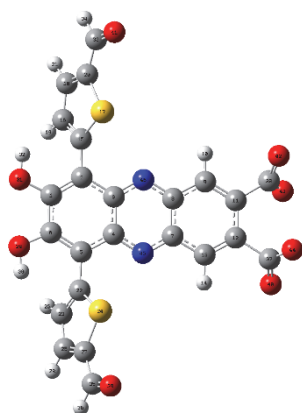

| Tag | Symbol | X        | Y        | Z        | Tag | Symbol | X        | Y        | Z        |
|-----|--------|----------|----------|----------|-----|--------|----------|----------|----------|
| 1   | C      | -0.69513 | -3.15907 | -0.41176 | 24  | S      | 3.844521 | -1.4827  | 1.030988 |
| 2   | C      | -1.41733 | -1.98591 | -0.36404 | 25  | C      | 5.119748 | -2.40805 | -1.02291 |
| 3   | C      | -0.71558 | -0.73043 | -0.31316 | 26  | H      | 3.372384 | -2.82251 | -2.30912 |
| 4   | C      | 0.727853 | -0.71974 | -0.30576 | 27  | C      | 5.342767 | -1.89709 | 0.238596 |
| 5   | C      | 1.447734 | -1.96468 | -0.35684 | 28  | H      | 5.92044  | -2.71878 | -1.6818  |
| 6   | C      | 0.743105 | -3.14814 | -0.40987 | 29  | O      | 1.319704 | -4.37103 | -0.43574 |
| 7   | C      | 0.707837 | 1.575155 | -0.23884 | 30  | H      | 2.283661 | -4.27598 | -0.40712 |
| 8   | C      | -0.72973 | 1.564587 | -0.25074 | 31  | O      | -1.25292 | -4.39079 | -0.43597 |
| 9   | C      | -1.42349 | 2.805544 | -0.21868 | 32  | H      | -2.21825 | -4.31048 | -0.40812 |
| 10  | H      | -2.50738 | 2.781595 | -0.2333  | 33  | C      | -6.60809 | -1.78302 | 0.855165 |
| 11  | C      | -0.7506  | 4.001826 | -0.17415 | 34  | H      | -7.45972 | -2.11292 | 0.232513 |
| 12  | C      | 0.69099  | 4.012267 | -0.15492 | 35  | C      | 6.634618 | -1.70118 | 0.868993 |
| 13  | C      | 1.382521 | 2.826293 | -0.1936  | 36  | H      | 7.490976 | -2.01159 | 0.242811 |
| 14  | H      | 2.46674  | 2.817834 | -0.18071 | 37  | C      | 1.473217 | 5.315175 | 0.007364 |
| 15  | C      | -2.89136 | -2.04115 | -0.36363 | 38  | C      | -1.55528 | 5.299743 | -0.23989 |
| 16  | C      | -3.709   | -2.53653 | -1.36072 | 39  | O      | 6.810743 | -1.24082 | 1.987174 |
| 17  | S      | -3.82176 | -1.52216 | 1.015363 | 40  | O      | 2.345672 | 5.574606 | -0.85915 |
| 18  | C      | -5.08215 | -2.49008 | -1.02797 | 41  | O      | -6.79117 | -1.31227 | 1.967897 |
| 19  | H      | -3.3285  | -2.89378 | -2.30884 | 42  | O      | -2.435   | 5.473578 | 0.640722 |
| 20  | C      | -5.31329 | -1.96766 | 0.227381 | 43  | O      | -1.28774 | 6.054371 | -1.20965 |
| 21  | H      | -5.87788 | -2.81997 | -1.68355 | 44  | O      | 1.194254 | 5.98646  | 1.033672 |
| 22  | C      | 2.922511 | -1.99886 | -0.35457 | 45  | N      | 1.40698  | 0.428917 | -0.27439 |
| 23  | C      | 3.747557 | -2.4705  | -1.35694 | 46  | N      | -1.41148 | 0.408302 | -0.29519 |

**Table S7** Vertical excitation energy for  $S_1$  state and  $T_1$ – $T_4$  states and  $\Delta E_{ST}$  ( $S_1$ – $T_1$ ) values of **KO-2**, **KY-1**, **KY-2** at the B3LYP/6-311G(d,p)/DMSO-IEFPCM level; **KY-1Na** and **KY-2Na** at the B3LYP/6-311+G(d,p)/DMSO-IEFPCM level; **KY-1Na** and **KY-2Na** at the B3LYP/6-311+G(d,p)/Water-IEFPCM level by TDDFT calculations.

| Dye                        | $\Delta E_{ST}$ ( $S_1$ – $T_1$ )/eV | $S_1$ /eV | $T_1$ /eV | $T_2$ /eV | $T_3$ /eV | $T_4$ /eV |
|----------------------------|--------------------------------------|-----------|-----------|-----------|-----------|-----------|
| <b>KO-2</b> <sup>a</sup>   | 0.9264                               | 2.8456    | 1.9192    | 2.4988    | 2.5745    | 2.7024    |
| <b>KY-1</b> <sup>a</sup>   | 0.8518                               | 2.7204    | 1.8686    | 2.4581    | 2.5789    | 2.6988    |
| <b>KY-2</b> <sup>a</sup>   | 0.8124                               | 2.7023    | 1.8899    | 2.4456    | 2.613     | 2.7046    |
| <b>KY-1Na</b> <sup>a</sup> | 0.957                                | 2.8787    | 1.9217    | 2.538     | 2.6444    | 2.7052    |
| <b>KY-2Na</b> <sup>a</sup> | 0.8038                               | 2.6814    | 1.8776    | 2.3092    | 2.577     | 2.6573    |
| <b>KY-1Na</b> <sup>b</sup> | 0.9773                               | 2.8995    | 1.9222    | 2.5363    | 2.6459    | 2.7046    |
| <b>KY-2Na</b> <sup>b</sup> | 0.8196                               | 2.7015    | 1.8819    | 2.3196    | 2.582     | 2.6601    |

<sup>a</sup> Calculated at DMSO-IEFPCM level. <sup>b</sup> Calculated at Water-IEFPCM level.

## Evaluation of $^1\text{O}_2$ quantum yield

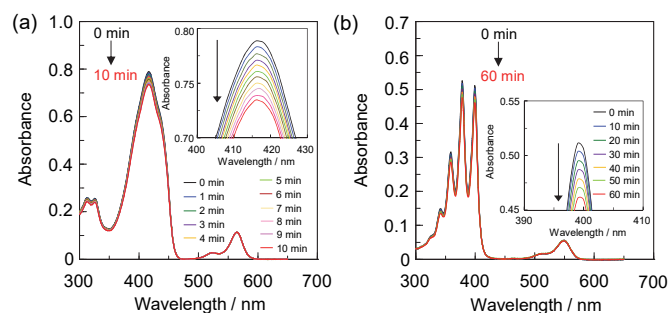

**Fig. S44** (a) Photoabsorption spectra for the photooxidation of DPBF ( $5.0 \times 10^{-5}$  M) in the presence of **RB** under photoirradiation with 532 nm ( $300 \mu\text{W cm}^{-2}$ ) in DMSO. Insets are magnifications of maxima in the spectra at around 415 nm. (b) Photoabsorption spectra for the photooxidation of ABDA ( $5.0 \times 10^{-5}$  M) in the presence of **RB** under photoirradiation with 532 nm ( $300 \mu\text{W cm}^{-2}$ ) in D<sub>2</sub>O/DMSO (99:1, v/v). Insets are magnifications of maxima in the spectra at around 400 nm.

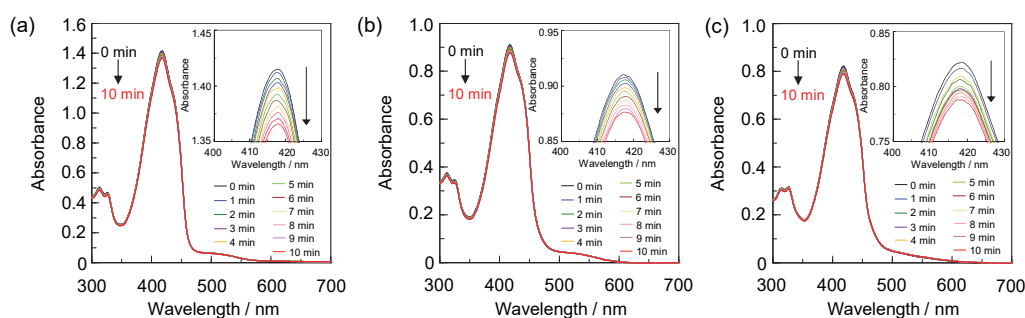

**Fig. S45** Photoabsorption spectra for the photooxidation of DPBF ( $5.0 \times 10^{-5}$  M) in the presence of (a) **KO-2**, (b) **KY-1**, and (c) **KY-2** under photoirradiation with 532 nm ( $300 \mu\text{W cm}^{-2}$ ) in DMSO. Insets are magnifications of maxima in the spectra at around 415 nm.

## Photodynamic activity against cancer cell lines

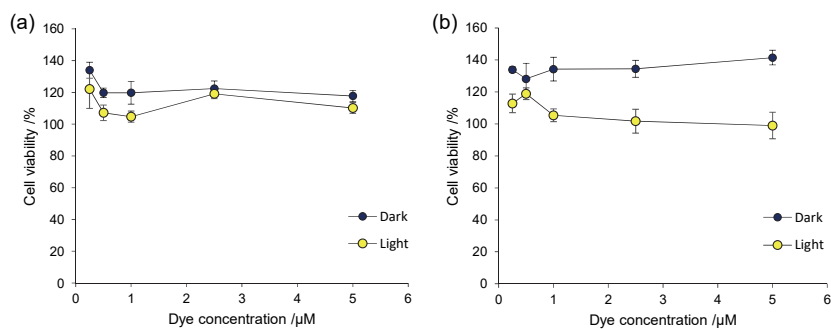

**Fig. S46** Photoirradiation-induced anticancer effects on Colon26 cells. Colon26 cells were coincubated with (a) **KY-1Na** or (b) **KY-2Na** for 24 h. Subsequently, the cells were photoirradiated ( $> 510$  nm,  $9$   $\text{mW}/\text{cm}^2$ ) for 30 min. After an additional 24 h, the cell viability was measured with the WST-8 assay ( $N=3$ ). The data were presented as mean  $\pm$  SD.

## Evaluation of cellular uptake of KY-2Na

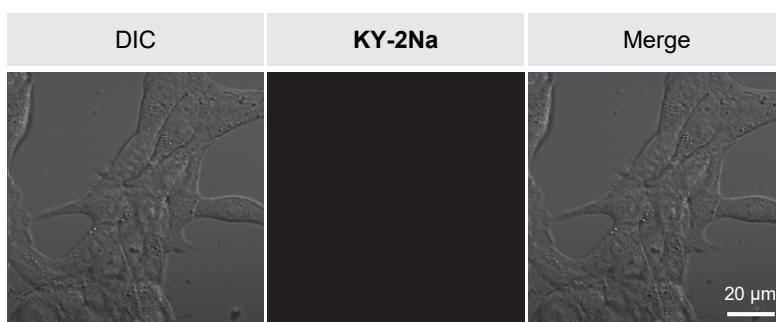

**Fig. S47** Observation of cellular uptake of **KY-2Na** in the Colon26 cells by confocal laser scanning microscopy ( $\lambda^{\text{ex}} = 488$  nm) and differential interference contrast (DIC). After 24 h of incubation with **KY-2Na**. Scale bar = 20  $\mu\text{m}$ .
